# Supplementary material
Source: MDPI journal article supplement (https://www.mdpi.com/2304-6740/11/10/396)
Supplement: s1 [file s1]

## Anti-proliferation and nuclease activities of copper(II) complexes of tripodal polyamine ligands

Doti Serre, Sule Erbek, Nathalie Berthet, Christian Philouze, Xavier Ronot, Véronique Martel-Frachet, and Fabrice Thomas

### Content:

|                                                                                 |            |
|---------------------------------------------------------------------------------|------------|
| <b>Figures.....</b>                                                             | <b>S2</b>  |
| Fig. S1-8: $^1\text{H}$ NMR and MS spectra of the ligands                       |            |
| Fig. S9: MS spectra of the complexes                                            |            |
| Fig. S10: Jobs' plot of <b>4</b>                                                |            |
| Fig. S11-15: EPR spectra of the complexes                                       |            |
| Fig. S16-22: Electronic spectra of the complexes                                |            |
| Fig. S23-24: CV curves of the complexes                                         |            |
| Fig. S25-26: Agarose gel electrophoresis                                        |            |
| Fig. S27: Numbering used for the assignment of the $^1\text{H}$ NMR resonances. |            |
| <b>Details about the DFT calculations.....</b>                                  | <b>S13</b> |

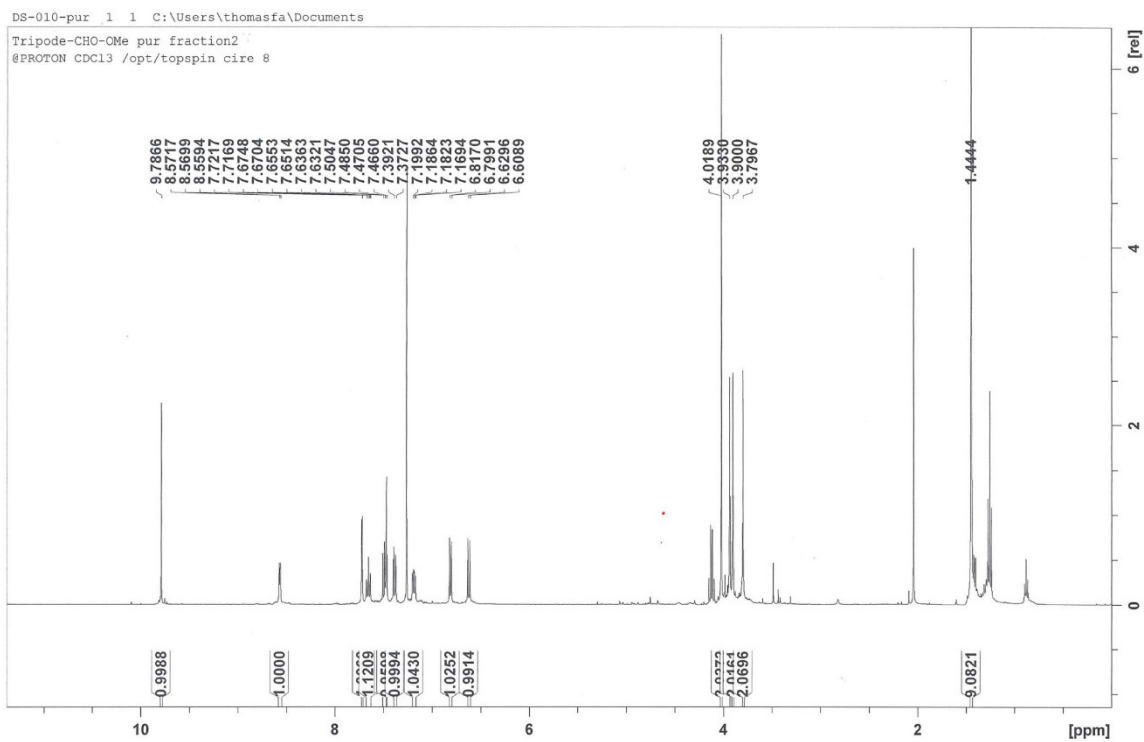

Fig. S1  $^1\text{H}$  NMR spectrum of  $\text{HL}^{\text{CHO}}$

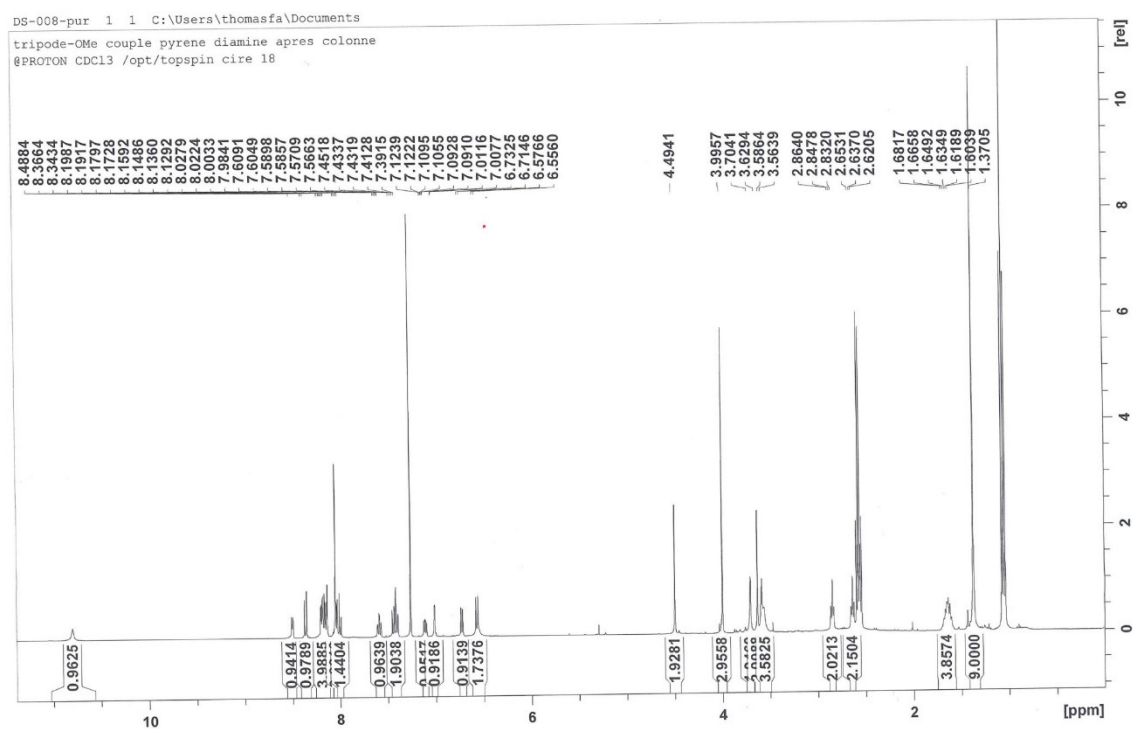

Fig. S2  $^1\text{H}$  NMR spectrum of  $\text{HL}^{\text{pyr}}$

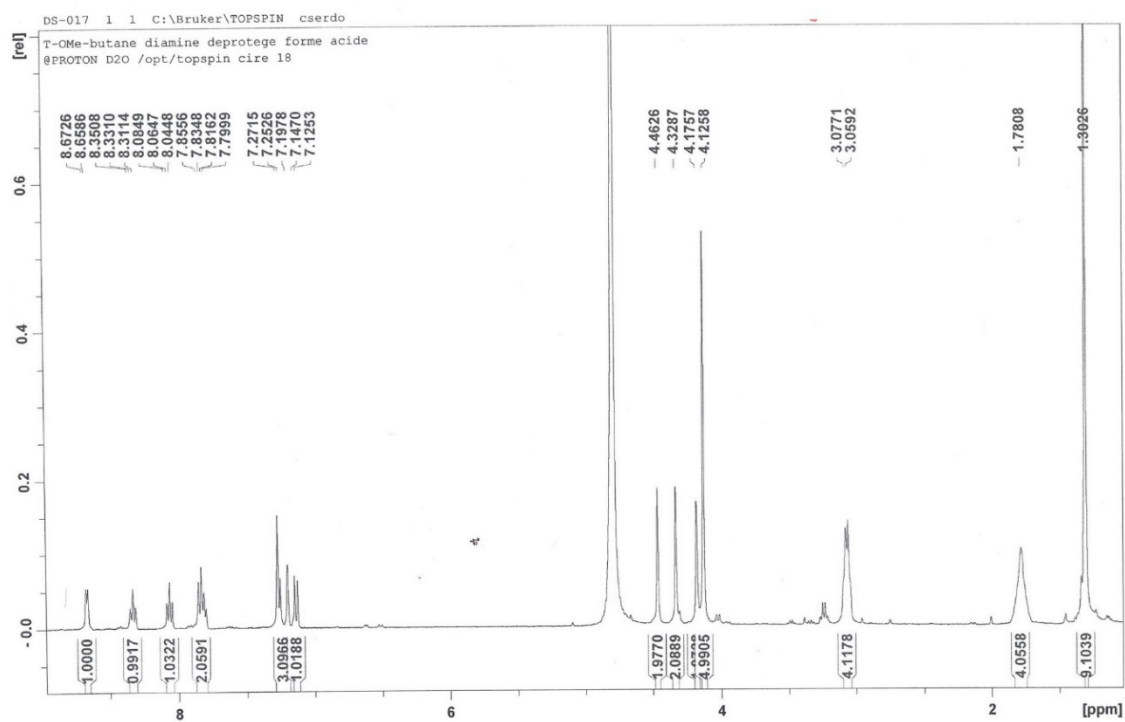

Fig. S3  $^1\text{H}$  NMR spectrum of  $\text{HL}^{\text{amine}}$

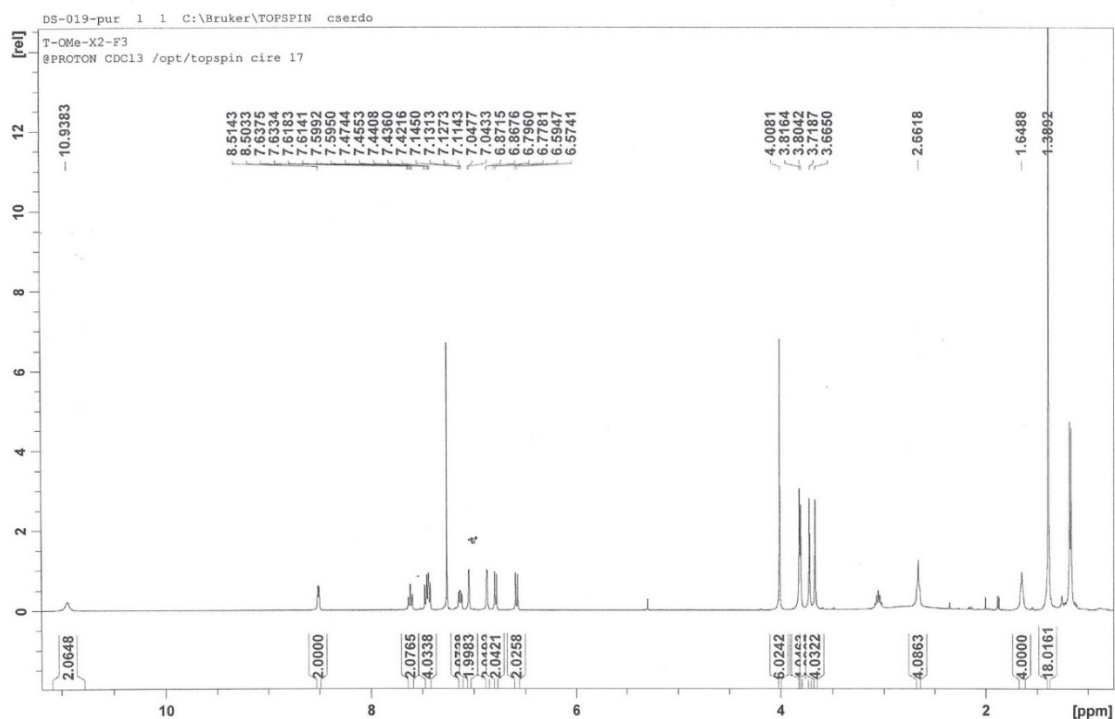

Fig. S4  $^1\text{H}$  NMR spectrum of  $\text{H}_2\text{L}^{\text{bis}}$

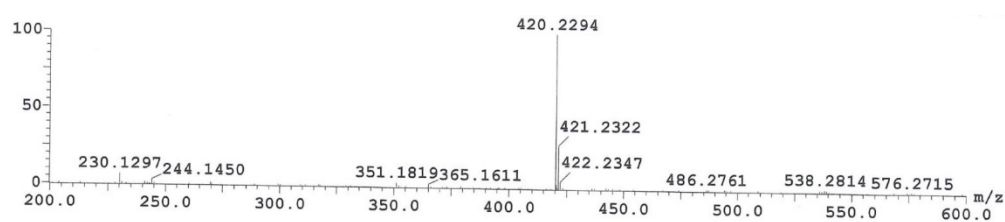

**Fig. S5** HRMS of  $\text{HL}^{\text{CHO}}$

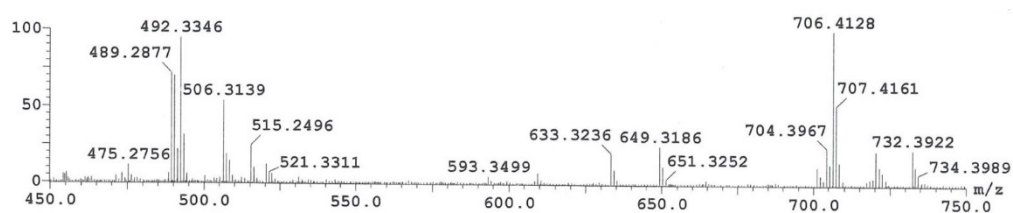

**Fig. S6** HRMS of  $\text{HL}^{\text{Pyr}}$

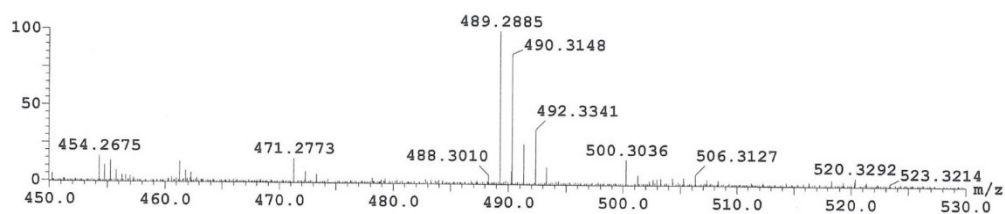

**Fig. S7** HRMS of  $\text{HL}^{\text{amine}}$

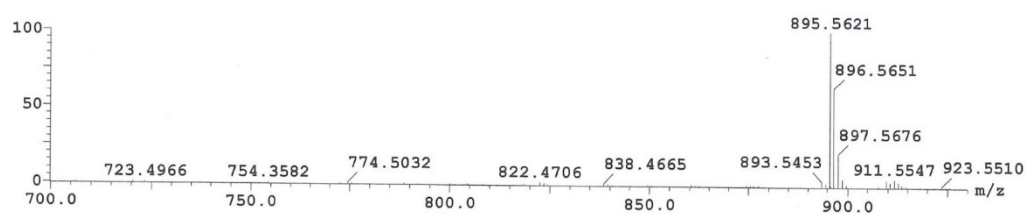

**Fig. S8** HRMS of  $\text{H}_2\text{L}^{\text{bis}}$

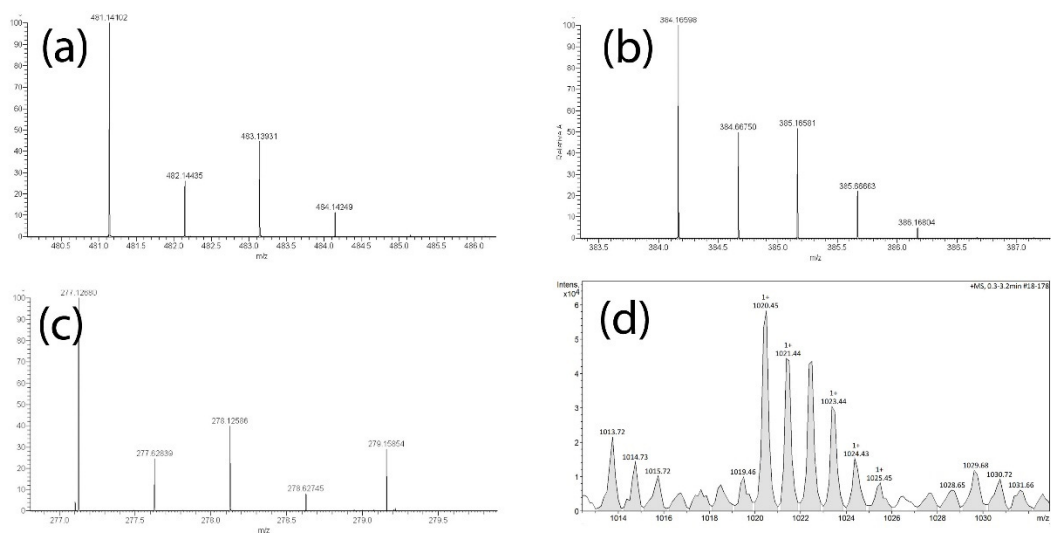

**Fig. S9** Mass spectra of the complexes : HRMS of a) **1** ; b) **2** ; c) **3** ; d) ESI-MS of **4**. It was not possible to get a HRMS spectrum for **4**, only the ESI-MS spectrum is provided.

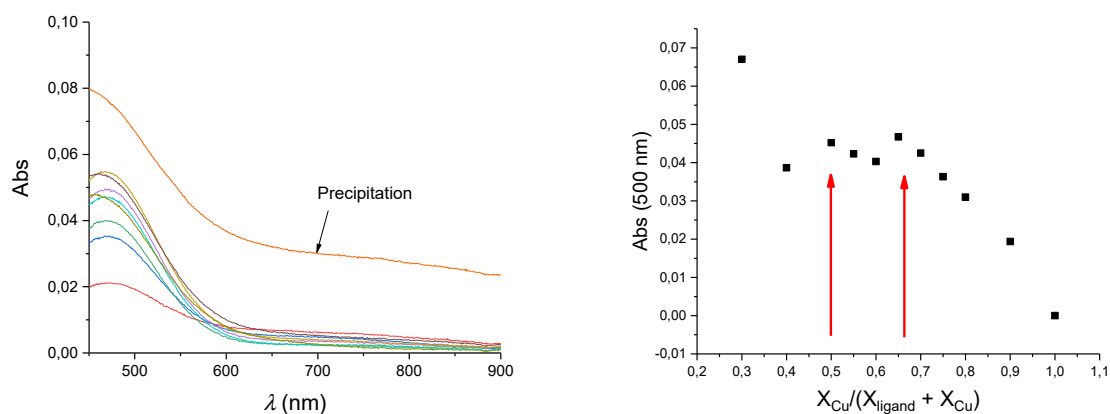

**Figure S10** Job's of complex **4** : Left, evolution of the UV-Vis spectrum as a function of  $\chi_{Cu}$  and  $\chi_{ligand}$  ( $[Cu^{2+}] = 0.01-0.033$  mM;  $[H_2L^{bis}] = 0-0.023$  mM); Right, Job's plot diagram showing maximum peaks at  $\chi_{Cu}/(\chi_{Cu} + \chi_{ligand}) = 0.5$  (complex with 1:1 Cu:Ligand stoichiometry) and  $\chi_{Cu}/(\chi_{Cu} + \chi_{ligand}) = 0.66$  (complex with 2:1 Cu:Ligand stoichiometry). H<sub>2</sub>O: DMF 90: 10 solution at pH 7. [Tris-HCl] = 0.05 M, [NaCl] = 0.02 M; T, 298 K; Note that a precipitation is observed at  $\chi_{Cu}/(\chi_{Cu} + \chi_{ligand}) \leq 0.3$ .

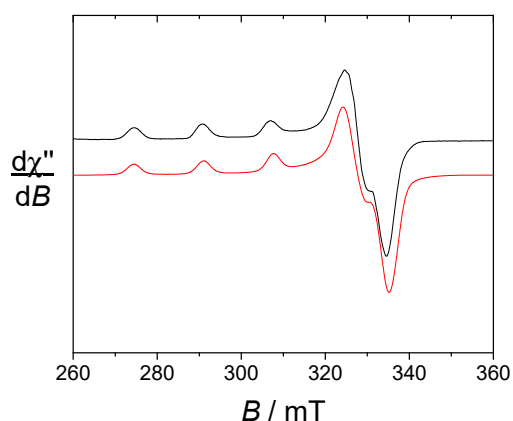

**Figure S11.** X-Band EPR spectra of a 0.5 mM solution of **1** in a water: DMF 90:10 medium at pH 7. Black: Experimental spectrum; Red: simulation by using the parameters given in Table 2.

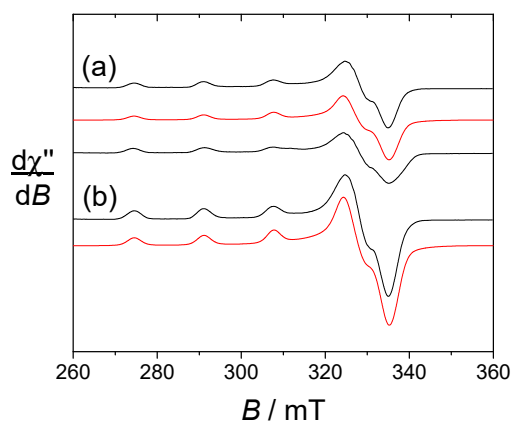

**Figure S12.** X-Band EPR spectra of 0.5 mM solutions of (a, top) **2** (a, bottom) **3** and (b) **4** in a water: DMF 90:10 medium at pH 7. Black: Experimental spectrum; Red: simulation by using the parameters given in Table 2. [Tris-HCl] = 0.05 M, [NaCl] = 0.02 M;  $T$ , 100 K; microwave frequency, 9.44 GHz; microwave power, 4 mW; mod. Freq., 100 KHz; mod. Amp. 0.4 mT.

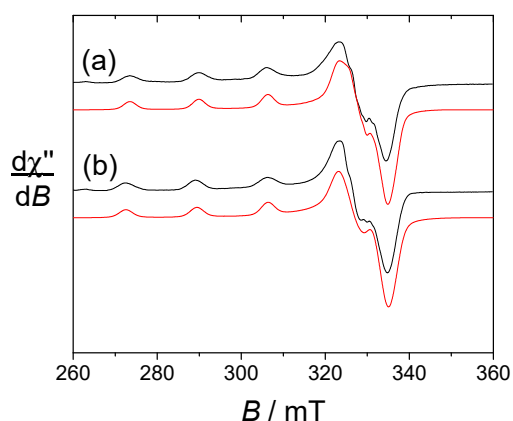

**Figure S13.** X-Band EPR spectra of a 0.5 mM solution of **1** in a water: DMF 90:10 medium at (top) pH = 3.80 and (bottom) pH = 1.80. Black: Experimental spectrum; Red: simulation by using the parameters given in Table 2. [NaCl] = 0.1 M;  $T$ , 100 K; microwave frequency, 9.44 GHz; microwave power, 4 mW; mod. Freq., 100 KHz; mod. Amp. 0.4 mT.

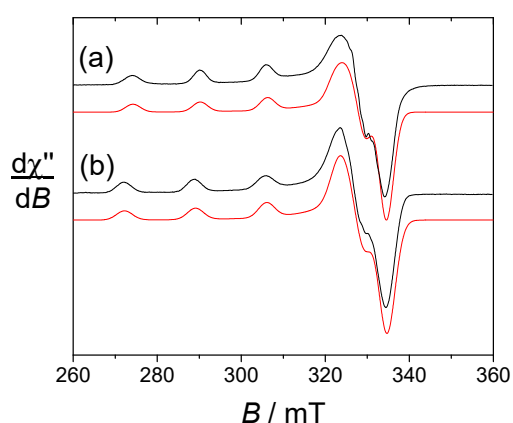

**Figure S14.** X-Band EPR spectra of a 0.5 mM solution of **3** in a water: DMF 90:10 medium at (top) pH = 5.26 and (bottom) pH = 3.25. Black: Experimental spectrum; Red: simulation by using the parameters given in Table 2. [NaCl] = 0.1 M;  $T$ , 100 K; microwave frequency, 9.44 GHz; microwave power, 4 mW; mod. Freq., 100 KHz; mod. Amp. 0.4 mT.

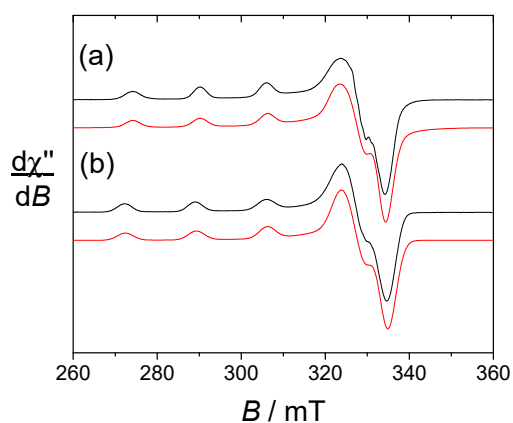

**Figure S15.** X-Band EPR spectra of a 0.5 mM solution of **4** in a water: DMF 90:10 medium at (top) pH = 5.35 and (bottom) pH = 3.34. Black: Experimental spectrum; Red: simulation by using the parameters given in Table 2. [NaCl] = 0.1 M;  $T$ , 100 K; microwave frequency, 9.44 GHz; microwave power, 4 mW; mod. Freq., 100 KHz; mod. Amp. 0.4 mT.

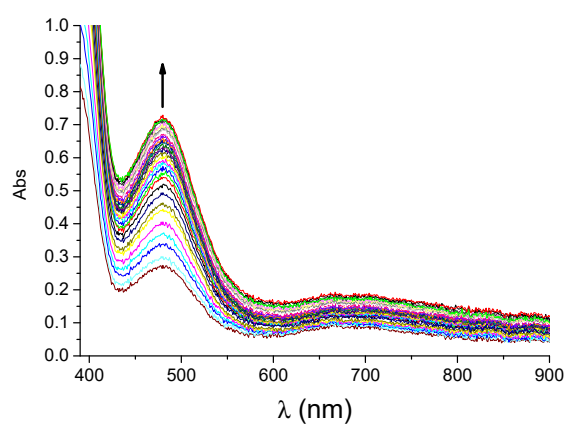

**Figure S16** pH-dependence of the electronic spectrum of **1** in a 1 mM H<sub>2</sub>O: DMF 90: 10 solution. [NaCl] = 0.1 M,  $T$  = 298 K,  $l$  = cm. pH varies from 2.66 to 7.33.



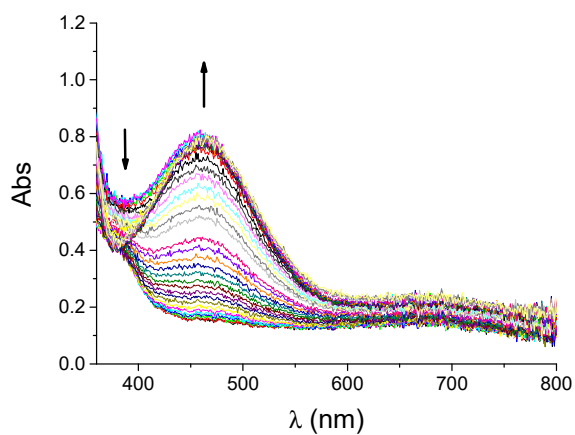

**Figure S17** pH-dependence of the electronic spectrum of **3** in a 1 mM H<sub>2</sub>O: DMF 90: 10 solution. [NaCl] = 0.1 M, T = 298 K, l = cm. pH varies from 2.57 to 7.37.

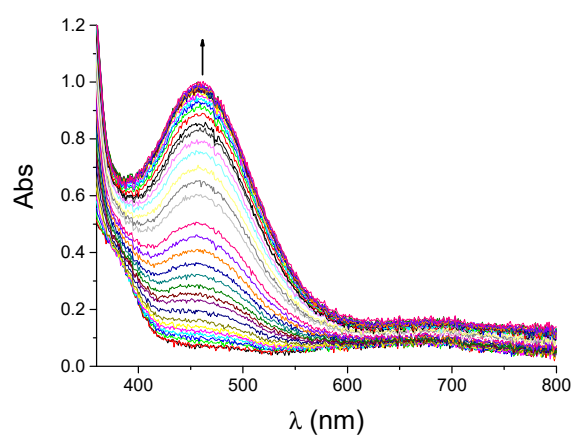

**Figure S18** pH-dependence of the electronic spectrum of **4** in a 0.5 mM H<sub>2</sub>O: DMF 90: 10 solution. [NaCl] = 0.1 M, T = 298 K, l = cm. pH varies from 2.64 to 7.05.

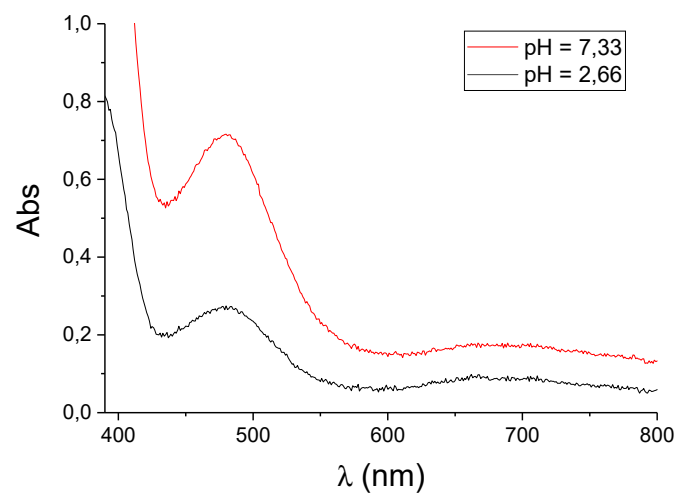

**Figure S19** Electronic spectrum of **1** in a 1 mM H<sub>2</sub>O: DMF 90: 10 solution. [NaCl] = 0.1 M, T = 298 K, l = cm.

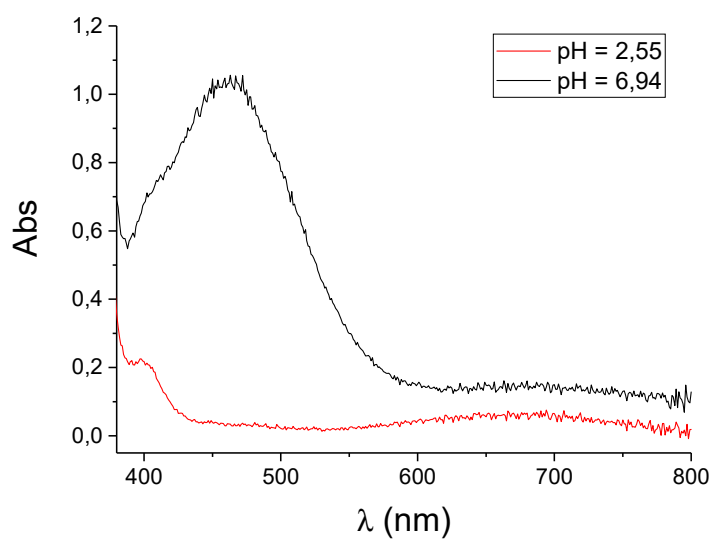

**Figure S20** Electronic spectrum of **2** in a 1 mM H<sub>2</sub>O: DMF 90: 10 solution. [NaCl] = 0.1 M, T = 298 K, l = cm.

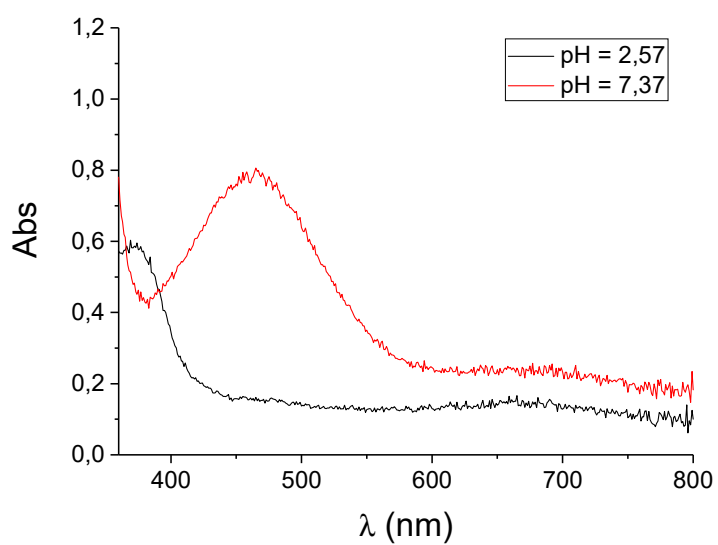

**Figure S21** Electronic spectrum of **3** in a 1 mM H<sub>2</sub>O: DMF 90: 10 solution. [NaCl] = 0.1 M, T = 298 K, l = cm.

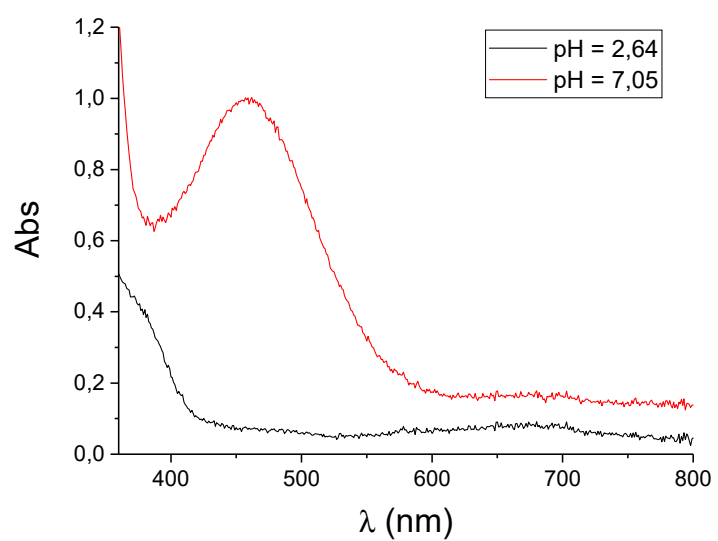

**Figure S22** Electronic spectrum of **4** in a 0.5 mM H<sub>2</sub>O: DMF 90: 10 solution. [NaCl] = 0.1 M, T = 298 K, l = cm.

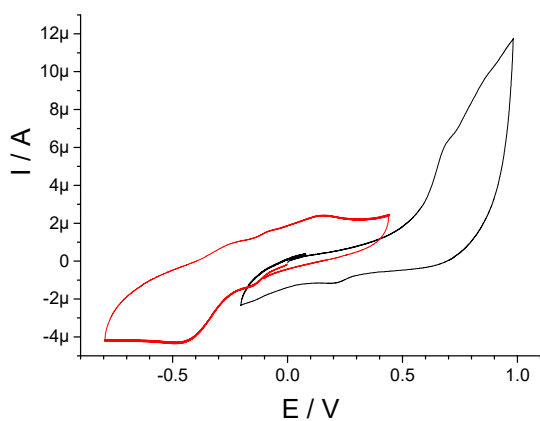

**Figure S23.** Cyclic voltammetry curves of **3** in a water:DMF 90:10 medium at pH 7. [Tris-HCl] = 0.05 M, [NaCl] = 0.02 M; T, 298 K; scan rate, 0.1 V sec<sup>-1</sup>; The potentials are given versus the SCE reference.

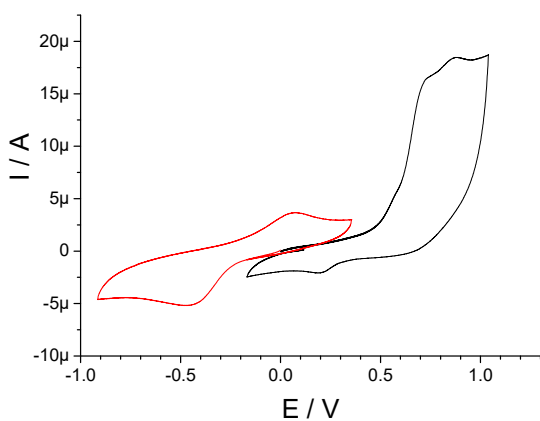

**Figure S24.** Cyclic voltammetry curves of **4** in a water:DMF 90:10 medium at pH 7. [Tris-HCl] = 0.05 M, [NaCl] = 0.02 M; T, 298 K; scan rate, 0.1 V sec<sup>-1</sup>; The potentials are given versus the SCE reference.

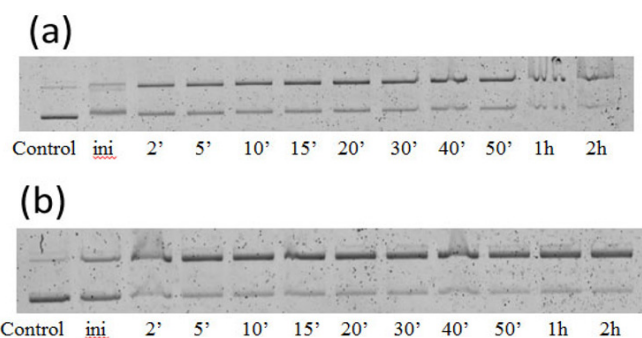

**Figure S25.** Agarose gel electrophoresis patterns of supercoiled  $\phi$ X174 DNA (20  $\mu$ M base pairs) incubated with the copper complexes in a phosphate buffer 10 mM pH 7.2 (+ 10 % DMF) at 37°C as a function of time; (a) **2**, 10  $\mu$ M; (b) **3**, 25  $\mu$ M.

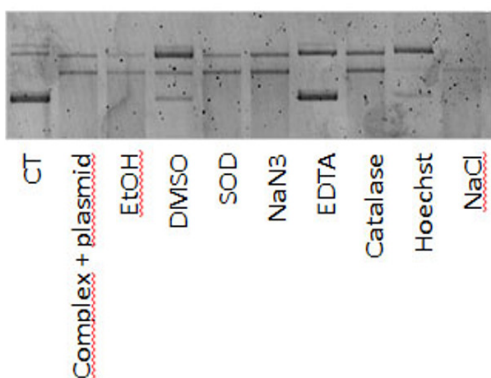

**Figure S26.** Agarose gel electrophoresis patterns of supercoiled  $\phi$ X174 DNA (20  $\mu$ M base pairs) incubated with the copper complex **3** in a phosphate buffer 10 mM pH 7.2 (+ 10 % DMF) at 37°C for 1h. [ascorbate] = 0.8 mM; Complex concentration = 30  $\mu$ M. Lane 0, DNA control; lane 1, DNA + complex (without scavenger); lanes 2-10, DNA + complex in the presence of agents: lane 2, ethanol; lane 3, DMSO (2  $\mu$ L); lane 4, Superoxide Dismutase (0.5 unit); lane 5, NaN<sub>3</sub> (100  $\mu$ M); lane 6, EDTA (10 mM); lane 7, Catalase (0.1 unit); lane 8, Hoechst 33258 (100  $\mu$ M); lane 9, NaCl (350  $\mu$ M).

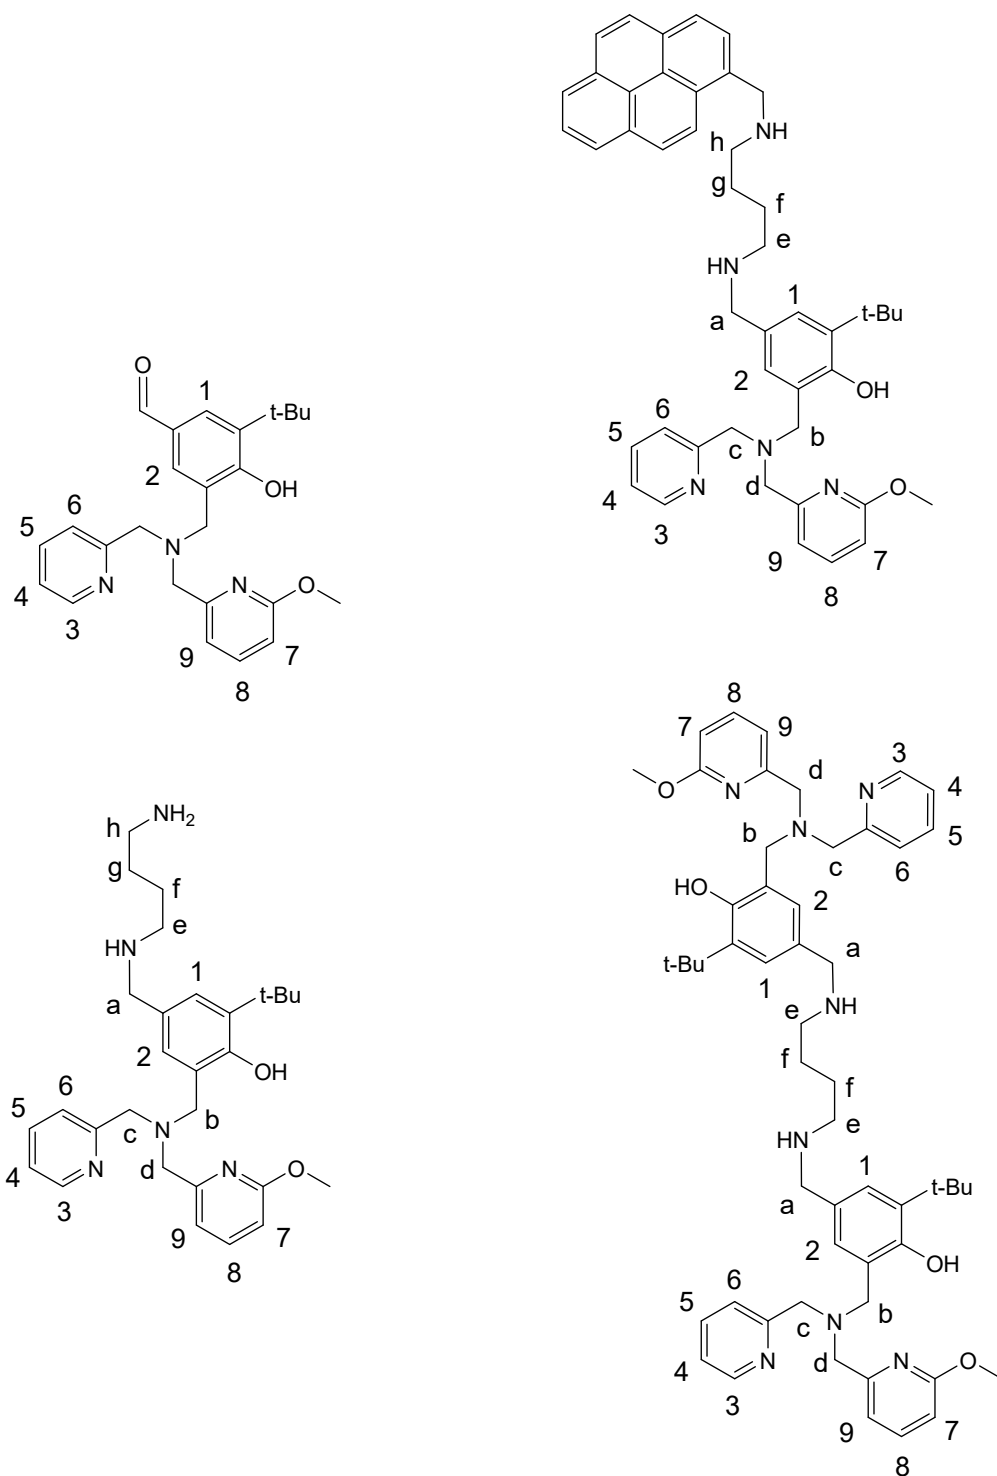

**Figure S27.** Selective numbering of the ligands  $\text{HL}^{\text{CHO}}$ ,  $\text{HL}^{\text{pyr}}$ ,  $\text{HL}^{\text{amine}}$  (the same numbering is used for  $\text{HL}^{\text{Boc}}$ ) and  $\text{H}_2\text{L}^{\text{bis}}$  for the assignment of the  $^1\text{H}$  NMR resonances.

## Details about the DFT calculations:

### Xyz coordinates

Phenol form, axial positioning of the phenol, exogeneous ligand = chloride

|    |              |              |              |
|----|--------------|--------------|--------------|
| Cu | 1.311468000  | -0.495513000 | -0.677699000 |
| O  | -0.209286000 | 1.259112000  | -0.082399000 |
| H  | -0.441840000 | 1.882943000  | -0.785740000 |
| C  | -4.623511000 | -0.423636000 | 3.103094000  |
| N  | 1.012307000  | -1.261711000 | 1.196233000  |
| N  | -0.217785000 | -1.686942000 | -1.152439000 |
| N  | 2.836225000  | 0.459760000  | 0.250776000  |
| Cl | 2.213657000  | -0.548318000 | -2.778660000 |
| C  | -1.339849000 | 0.912016000  | 0.648017000  |
| C  | -2.638538000 | 1.366049000  | 0.335106000  |
| C  | -3.667023000 | 0.904501000  | 1.171280000  |
| H  | -4.682938000 | 1.225336000  | 0.974983000  |
| C  | -3.461708000 | 0.052171000  | 2.262092000  |
| C  | -2.154472000 | -0.345287000 | 2.540050000  |
| H  | -1.954057000 | -0.980570000 | 3.399863000  |
| C  | -1.084700000 | 0.074410000  | 1.745432000  |
| C  | 0.327453000  | -0.296434000 | 2.126820000  |
| H  | 0.953152000  | 0.598594000  | 2.161602000  |
| H  | 0.326733000  | -0.741859000 | 3.129346000  |
| C  | -2.935087000 | 2.343051000  | -0.830325000 |
| C  | -4.439056000 | 2.676988000  | -0.929519000 |
| H  | -5.045854000 | 1.785451000  | -1.119886000 |
| H  | -4.596344000 | 3.367686000  | -1.764453000 |
| H  | -4.812420000 | 3.165040000  | -0.023291000 |
| C  | -2.537288000 | 1.721653000  | -2.194770000 |
| H  | -1.469699000 | 1.497840000  | -2.297419000 |
| H  | -2.793818000 | 2.411980000  | -3.005680000 |
| H  | -3.078098000 | 0.784053000  | -2.360843000 |
| C  | -2.201717000 | 3.691735000  | -0.603497000 |
| H  | -2.535226000 | 4.153186000  | 0.331871000  |
| H  | -2.427745000 | 4.381036000  | -1.424310000 |
| H  | -1.110141000 | 3.610992000  | -0.545777000 |
| C  | 3.482773000  | 1.604913000  | -0.074992000 |
| C  | 4.605672000  | 2.011244000  | 0.653594000  |
| H  | 5.114755000  | 2.925592000  | 0.370057000  |
| C  | 5.046271000  | 1.258573000  | 1.736530000  |
| H  | 5.915330000  | 1.570965000  | 2.306933000  |
| C  | 4.337655000  | 0.114475000  | 2.097521000  |
| H  | 4.623345000  | -0.481597000 | 2.957404000  |
| C  | 3.239722000  | -0.250453000 | 1.330217000  |
| C  | 2.945686000  | 2.449197000  | -1.194544000 |
| H  | 2.864849000  | 1.872931000  | -2.119527000 |
| H  | 3.590112000  | 3.314223000  | -1.364888000 |
| H  | 1.945200000  | 2.817310000  | -0.939220000 |
| C  | 2.416702000  | -1.479426000 | 1.638126000  |
| H  | 2.817007000  | -2.334239000 | 1.082445000  |
| H  | 2.467433000  | -1.727053000 | 2.705538000  |
| C  | -0.889031000 | -1.676666000 | -2.319366000 |
| H  | -0.501417000 | -1.012142000 | -3.081995000 |
| C  | -1.999310000 | -2.481151000 | -2.539843000 |
| H  | -2.511887000 | -2.442620000 | -3.494344000 |
| C  | -2.429366000 | -3.325621000 | -1.515180000 |
| H  | -3.296241000 | -3.964192000 | -1.652711000 |
| C  | -1.729963000 | -3.341588000 | -0.310843000 |
| H  | -2.031920000 | -3.989365000 | 0.505341000  |
| C  | -0.622473000 | -2.509866000 | -0.163856000 |
| C  | 0.254589000  | -2.533810000 | 1.064931000  |
| H  | -0.331350000 | -2.740719000 | 1.966007000  |
| H  | 0.971501000  | -3.354251000 | 0.955297000  |
| H  | -5.109942000 | -1.298598000 | 2.652128000  |
| H  | -5.388128000 | 0.353585000  | 3.205585000  |
| H  | -4.296618000 | -0.713125000 | 4.106913000  |

Phenolate form, equatorial positioning of the phenolate, exogeneous ligand = chloride:

|    |              |              |              |
|----|--------------|--------------|--------------|
| Cu | 0.685787000  | -0.507423000 | -0.779969000 |
| Cl | 1.000600000  | -2.690547000 | -1.725839000 |
| O  | -1.190295000 | -0.684234000 | -0.984473000 |
| C  | -2.114863000 | 0.201750000  | -0.630049000 |
| N  | 0.616501000  | 1.585033000  | -0.759298000 |
| N  | 2.689312000  | -0.157447000 | -0.963620000 |
| C  | -4.314437000 | 0.783802000  | 0.216306000  |
| H  | -5.277057000 | 0.489013000  | 0.622213000  |
| C  | -1.893034000 | 1.588763000  | -0.837643000 |
| C  | -4.088610000 | 2.158646000  | 0.040466000  |
| C  | 0.621717000  | 2.095824000  | 0.636797000  |
| H  | -0.425020000 | 2.231083000  | 0.927771000  |
| H  | 1.098545000  | 3.082104000  | 0.682451000  |

|   |              |              |              |
|---|--------------|--------------|--------------|
| C | 3.000406000  | 1.134733000  | -1.186296000 |
| N | 1.048540000  | -0.159450000 | 1.463779000  |
| C | 2.151792000  | -0.591844000 | 3.545665000  |
| H | 2.491555000  | -1.314843000 | 4.279856000  |
| C | -2.861021000 | 2.539017000  | -0.495157000 |
| H | -2.647501000 | 3.593586000  | -0.665479000 |
| C | -3.382445000 | -0.210482000 | -0.097423000 |
| C | 1.822436000  | 2.017004000  | -1.506026000 |
| H | 2.051481000  | 3.073408000  | -1.320090000 |
| H | 1.601052000  | 1.917045000  | -2.575290000 |
| C | 1.480633000  | -1.031195000 | 2.398712000  |
| C | 1.249031000  | 1.157932000  | 1.648512000  |
| C | -3.721213000 | -1.703192000 | 0.099945000  |
| C | -5.138065000 | 3.175300000  | 0.430120000  |
| H | -5.259986000 | 3.240952000  | 1.520087000  |
| C | 1.919435000  | 1.664663000  | 2.761331000  |
| H | 2.073302000  | 2.733646000  | 2.867695000  |
| C | 3.680469000  | -1.035500000 | -0.733205000 |
| H | 3.372467000  | -2.061807000 | -0.573046000 |
| C | -0.616447000 | 2.020601000  | -1.498707000 |
| H | -0.529478000 | 1.576766000  | -2.497423000 |
| H | -0.602114000 | 3.112682000  | -1.616534000 |
| C | -3.661627000 | -2.436666000 | -1.262153000 |
| H | -4.411701000 | -2.029312000 | -1.951723000 |
| H | -3.874710000 | -3.505414000 | -1.128917000 |
| H | -2.676886000 | -2.330463000 | -1.719732000 |
| C | 5.019208000  | -0.659313000 | -0.717208000 |
| H | 5.785866000  | -1.401979000 | -0.526045000 |
| C | 4.316518000  | 1.590557000  | -1.182326000 |
| H | 4.526347000  | 2.639611000  | -1.362441000 |
| C | 1.191948000  | -2.491658000 | 2.175310000  |
| H | 0.128568000  | -2.697997000 | 2.349000000  |
| H | 1.773386000  | -3.117693000 | 2.857174000  |
| H | 1.409818000  | -2.785639000 | 1.143988000  |
| C | 2.379100000  | 0.769614000  | 3.725177000  |
| H | 2.908736000  | 1.129270000  | 4.602408000  |
| C | -5.135929000 | -1.919889000 | 0.674985000  |
| H | -5.257630000 | -1.458376000 | 1.661987000  |
| H | -5.315513000 | -2.995132000 | 0.790075000  |
| H | -5.916316000 | -1.524937000 | 0.014160000  |
| C | -2.720272000 | -2.348661000 | 1.087408000  |
| H | -1.696431000 | -2.245819000 | 0.726300000  |
| H | -2.943100000 | -3.416361000 | 1.211919000  |
| H | -2.791638000 | -1.874240000 | 2.074361000  |
| C | 5.343040000  | 0.678168000  | -0.944588000 |
| H | 6.377548000  | 1.007006000  | -0.934110000 |
| H | -6.122484000 | 2.921802000  | 0.017007000  |
| H | -4.873855000 | 4.175672000  | 0.070777000  |

Phenol form, axial positioning of the phenol, exogeneous ligand = water:

|    |              |              |              |
|----|--------------|--------------|--------------|
| Cu | 1.298958000  | -0.451623000 | -0.780163000 |
| O  | -0.094305000 | 1.269612000  | 0.021319000  |
| H  | -0.277354000 | 2.065197000  | -0.501204000 |
| C  | -4.549370000 | -0.726043000 | 2.961621000  |
| N  | 1.086475000  | -1.390282000 | 0.997841000  |
| N  | -0.213371000 | -1.576654000 | -1.352479000 |
| N  | 2.917138000  | 0.358363000  | 0.054184000  |
| O  | 1.999035000  | -0.413377000 | -2.691987000 |
| C  | -1.234406000 | 0.865556000  | 0.712870000  |
| C  | -2.523154000 | 1.378927000  | 0.458225000  |
| C  | -3.561334000 | 0.829257000  | 1.226237000  |
| H  | -4.571436000 | 1.187604000  | 1.068895000  |
| C  | -3.374521000 | -0.162227000 | 2.196819000  |
| C  | -2.075113000 | -0.611017000 | 2.427705000  |
| H  | -1.888318000 | -1.354582000 | 3.198541000  |
| C  | -0.996091000 | -0.105142000 | 1.697649000  |
| C  | 0.410809000  | -0.529749000 | 2.035196000  |
| H  | 1.047025000  | 0.349027000  | 2.167600000  |
| H  | 0.411225000  | -1.088358000 | 2.978189000  |
| C  | -2.800794000 | 2.502215000  | -0.571080000 |
| C  | -4.300587000 | 2.862739000  | -0.634103000 |
| H  | -4.914116000 | 2.009811000  | -0.942923000 |
| H  | -4.444568000 | 3.658578000  | -1.372222000 |
| H  | -4.675552000 | 3.231411000  | 0.326332000  |
| C  | -2.394729000 | 2.061818000  | -2.000684000 |
| H  | -1.330357000 | 1.832221000  | -2.111440000 |
| H  | -2.625462000 | 2.860538000  | -2.714015000 |
| H  | -2.952160000 | 1.167399000  | -2.298451000 |
| C  | -2.055470000 | 3.800966000  | -0.163085000 |
| H  | -2.380035000 | 4.133249000  | 0.828565000  |
| H  | -2.277276000 | 4.597513000  | -0.881559000 |
| H  | -0.963171000 | 3.708331000  | -0.124359000 |
| C  | 3.568652000  | 1.500699000  | -0.259874000 |
| C  | 4.672989000  | 1.913095000  | 0.494088000  |
| H  | 5.182505000  | 2.831394000  | 0.223582000  |
| C  | 5.093770000  | 1.156418000  | 1.579619000  |



|   |              |              |              |
|---|--------------|--------------|--------------|
| H | 5.945344000  | 1.472531000  | 2.173335000  |
| C | 4.394322000  | -0.004787000 | 1.912400000  |
| H | 4.676172000  | -0.608553000 | 2.767591000  |
| C | 3.313078000  | -0.372986000 | 1.128217000  |
| C | 3.100858000  | 2.323037000  | -1.429716000 |
| H | 3.809222000  | 2.248722000  | -2.264026000 |
| H | 3.046920000  | 3.379694000  | -1.151747000 |
| H | 2.116464000  | 2.016781000  | -1.786574000 |
| C | 2.507586000  | -1.623721000 | 1.387054000  |
| H | 2.898298000  | -2.437835000 | 0.767667000  |
| H | 2.585206000  | -1.934739000 | 2.434389000  |
| C | -0.933399000 | -1.429546000 | -2.482411000 |
| H | -0.605149000 | -0.654255000 | -3.165758000 |
| C | -2.036858000 | -2.223650000 | -2.759848000 |
| H | -2.588223000 | -2.077131000 | -3.681306000 |
| C | -2.414251000 | -3.192251000 | -1.827903000 |
| H | -3.277447000 | -3.824289000 | -2.009618000 |
| C | -1.673955000 | -3.337629000 | -0.656839000 |
| H | -1.943019000 | -4.077718000 | 0.088872000  |
| C | -0.570929000 | -2.514301000 | -0.448540000 |
| C | 0.339222000  | -2.655319000 | 0.748573000  |
| H | -0.221750000 | -2.959974000 | 1.636835000  |
| H | 1.063294000  | -3.448836000 | 0.538986000  |
| H | -5.259938000 | 0.059739000  | 3.239945000  |
| H | -4.223289000 | -1.230429000 | 3.876477000  |
| H | -5.099441000 | -1.460471000 | 2.359022000  |
| H | 1.952642000  | -1.285163000 | -3.123860000 |
| H | 2.906482000  | -0.098377000 | -2.845640000 |

Phenolate form, equatorial positioning of the phenolate, exogeneous ligand = water:

|    |              |              |              |
|----|--------------|--------------|--------------|
| Cu | 0.721197000  | -0.391697000 | -0.802341000 |
| O  | -1.135272000 | -0.558762000 | -1.115799000 |
| C  | -2.077945000 | 0.254613000  | -0.629812000 |
| N  | 0.690441000  | 1.635834000  | -0.454060000 |
| N  | 2.676225000  | -0.116789000 | -1.153097000 |
| C  | -4.282206000 | 0.691137000  | 0.267975000  |
| H  | -5.254284000 | 0.338336000  | 0.596443000  |
| C  | -1.830950000 | 1.650031000  | -0.574556000 |
| C  | -4.038967000 | 2.070667000  | 0.354454000  |
| C  | 0.675058000  | 1.888167000  | 1.011407000  |
| H  | -0.376614000 | 1.949877000  | 1.309979000  |
| H  | 1.133030000  | 2.856796000  | 1.240552000  |
| C  | 3.046327000  | 1.179342000  | -1.102020000 |
| N  | 1.154168000  | -0.472869000 | 1.398823000  |
| C  | 2.204250000  | -1.273519000 | 3.395356000  |
| H  | 2.537344000  | -2.116092000 | 3.991929000  |
| C  | -2.797653000 | 2.530914000  | -0.078005000 |
| H  | -2.572892000 | 3.595776000  | -0.043878000 |
| C  | -3.351845000 | -0.239701000 | -0.207252000 |
| C  | 1.912879000  | 2.176539000  | -1.107298000 |
| H  | 2.217898000  | 3.125656000  | -0.653285000 |
| H  | 1.661647000  | 2.388066000  | -2.153024000 |
| C  | 1.586951000  | -1.499881000 | 2.160948000  |
| C  | 1.312019000  | 0.789709000  | 1.838257000  |
| C  | -3.704344000 | -1.739977000 | -0.296577000 |
| C  | -5.087811000 | 3.010484000  | 0.904716000  |
| H  | -5.237420000 | 2.866636000  | 1.983272000  |
| C  | 1.938134000  | 1.087150000  | 3.047554000  |
| H  | 2.057310000  | 2.118690000  | 3.362123000  |
| C  | 3.622499000  | -1.069531000 | -1.237022000 |
| H  | 3.270793000  | -2.095203000 | -1.268499000 |
| C  | -0.539819000 | 2.188032000  | -1.127087000 |
| H  | -0.435735000 | 1.921377000  | -2.184922000 |
| H  | -0.527077000 | 3.282989000  | -1.054830000 |
| C  | -3.661972000 | -2.198901000 | -1.774409000 |
| H  | -4.415895000 | -1.665073000 | -2.365671000 |
| H  | -3.876567000 | -3.272609000 | -1.846473000 |
| H  | -2.684538000 | -2.010646000 | -2.223513000 |
| C  | 4.977933000  | -0.767572000 | -1.282405000 |
| H  | 5.707568000  | -1.566044000 | -1.354541000 |
| C  | 4.386007000  | 1.558545000  | -1.126315000 |
| H  | 4.652131000  | 2.608905000  | -1.075518000 |
| C  | 1.388365000  | -2.894243000 | 1.629459000  |
| H  | 0.366824000  | -3.028342000 | 1.260893000  |
| H  | 1.581819000  | -3.640364000 | 2.404053000  |
| H  | 2.068518000  | -3.095324000 | 0.793420000  |
| C  | 2.390264000  | 0.033176000  | 3.838267000  |
| H  | 2.879472000  | 0.228227000  | 4.787835000  |
| C  | -5.120046000 | -2.046452000 | 0.235146000  |
| H  | -5.231858000 | -1.773604000 | 1.290880000  |
| H  | -5.310178000 | -3.122618000 | 0.150375000  |
| H  | -5.898788000 | -1.529469000 | -0.337020000 |
| C  | -2.711714000 | -2.575624000 | 0.546599000  |
| H  | -1.686093000 | -2.431569000 | 0.204264000  |
| H  | -2.957565000 | -3.642616000 | 0.474969000  |
| H  | -2.765924000 | -2.288677000 | 1.603933000  |

|   |              |              |              |
|---|--------------|--------------|--------------|
| C | 5.365346000  | 0.571269000  | -1.220020000 |
| H | 6.415825000  | 0.843401000  | -1.241076000 |
| H | -6.062335000 | 2.854191000  | 0.425871000  |
| H | -4.803496000 | 4.056585000  | 0.750000000  |
| O | 0.706083000  | -2.157131000 | -1.896392000 |
| H | 1.079238000  | -2.056352000 | -2.789457000 |
| H | -0.263737000 | -2.184012000 | -2.019479000 |

TD-DFT results:

Phenol form, axial positioning of the phenol, exogeneous ligand = chloride:

Excited State 1: 2.002-A 1.5342 eV 808.15 nm f=0.0005 <S\*\*2>=0.752

|             |          |
|-------------|----------|
| 107B ->128B | 0.14198  |
| 110B ->128B | 0.11776  |
| 111B ->128B | -0.24811 |
| 113B ->128B | 0.24610  |
| 120B ->128B | 0.54694  |
| 123B ->128B | -0.15893 |
| 124B ->128B | 0.40700  |
| 125B ->128B | -0.50389 |
| 127B ->128B | 0.25113  |

This state for optimization and/or second-order correction.

Total Energy, E(TD-HF/TD-KS) = -3311.23663497

Copying the excited state density for this state as the 1-particle RhoCI density.

Excited State 2: 2.002-A 1.8752 eV 661.19 nm f=0.0006 <S\*\*2>=0.752

|             |          |
|-------------|----------|
| 104B ->128B | 0.10201  |
| 108B ->128B | 0.47002  |
| 111B ->128B | 0.11069  |
| 112B ->128B | -0.31829 |
| 113B ->128B | -0.19253 |
| 118B ->128B | -0.18277 |
| 119B ->128B | -0.45675 |
| 120B ->128B | 0.26351  |
| 121B ->128B | -0.28265 |
| 124B ->128B | 0.23174  |
| 125B ->128B | 0.35158  |
| 127B ->128B | 0.11848  |

Excited State 3: 2.001-A 1.9025 eV 651.69 nm f=0.0012 <S\*\*2>=0.751

|             |          |
|-------------|----------|
| 107B ->128B | -0.13376 |
| 108B ->128B | 0.20799  |
| 112B ->128B | -0.14257 |
| 113B ->128B | 0.44872  |
| 114B ->128B | -0.21454 |
| 116B ->128B | 0.11224  |
| 118B ->128B | 0.22774  |
| 119B ->128B | -0.37031 |
| 120B ->128B | -0.44764 |
| 121B ->128B | 0.36562  |
| 124B ->128B | 0.28995  |
| 126B ->128B | -0.10035 |

Excited State 4: 2.002-A 2.1062 eV 588.66 nm f=0.0018 <S\*\*2>=0.752

|             |          |
|-------------|----------|
| 104B ->128B | 0.12453  |
| 107B ->128B | -0.11009 |
| 108B ->128B | 0.47248  |
| 110B ->128B | -0.19036 |
| 112B ->128B | 0.49476  |
| 116B ->128B | -0.30761 |
| 117B ->128B | 0.21601  |
| 118B ->128B | 0.17804  |
| 119B ->128B | 0.34384  |
| 124B ->128B | 0.31311  |
| 125B ->128B | 0.18219  |

Excited State 5: 2.013-A 2.7611 eV 449.04 nm f=0.0006 <S\*\*2>=0.763

|             |          |
|-------------|----------|
| 120B ->128B | -0.19104 |
| 124B ->128B | -0.10083 |
| 125B ->128B | 0.12818  |
| 127B ->128B | 0.95020  |

Excited State 6: 2.016-A 3.4155 eV 363.00 nm f=0.0015 <S\*\*2>=0.766

|             |          |
|-------------|----------|
| 108B ->128B | 0.22549  |
| 119B ->128B | -0.11283 |
| 120B ->128B | -0.13887 |
| 124B ->128B | -0.18769 |
| 125B ->128B | -0.38260 |
| 126B ->128B | 0.83404  |

Excited State 7: 2.013-A 3.4879 eV 355.47 nm f=0.0023 <S\*\*2>=0.764

|             |          |
|-------------|----------|
| 108B ->128B | -0.35140 |
| 113B ->128B | 0.10936  |
| 116B ->128B | 0.10500  |
| 119B ->128B | 0.13932  |

|                                                                     |          |
|---------------------------------------------------------------------|----------|
| 121B ->128B                                                         | 0.21627  |
| 124B ->128B                                                         | 0.40048  |
| 125B ->128B                                                         | 0.54688  |
| 126B ->128B                                                         | 0.52975  |
| Excited State 8: 3.459-A 3.5684 eV 347.45 nm f=0.0000 <S**2>=2.742  |          |
| 126A ->131A                                                         | -0.16527 |
| 126A ->133A                                                         | -0.32870 |
| 126A ->134A                                                         | -0.10022 |
| 128A ->129A                                                         | 0.20578  |
| 128A ->133A                                                         | 0.23415  |
| 128A ->134A                                                         | -0.47353 |
| 126B ->131B                                                         | 0.16387  |
| 126B ->133B                                                         | 0.32966  |
| 127B ->129B                                                         | -0.19983 |
| 127B ->133B                                                         | -0.22884 |
| 127B ->134B                                                         | 0.47493  |
| Excited State 9: 2.027-A 3.5876 eV 345.59 nm f=0.0025 <S**2>=0.777  |          |
| 108B ->128B                                                         | -0.21145 |
| 111B ->128B                                                         | 0.13141  |
| 113B ->128B                                                         | -0.24358 |
| 114B ->128B                                                         | 0.10817  |
| 119B ->128B                                                         | 0.10404  |
| 120B ->128B                                                         | -0.39658 |
| 121B ->128B                                                         | -0.32901 |
| 122B ->128B                                                         | -0.17383 |
| 123B ->128B                                                         | 0.29539  |
| 124B ->128B                                                         | 0.58830  |
| 125B ->128B                                                         | -0.29326 |
| Excited State 10: 2.367-A 3.8044 eV 325.90 nm f=0.0010 <S**2>=1.150 |          |
| 123A ->129A                                                         | -0.17790 |
| 123A ->130A                                                         | 0.13973  |
| 113B ->128B                                                         | 0.10058  |
| 120B ->128B                                                         | 0.21500  |
| 121B ->128B                                                         | 0.17597  |
| 122B ->128B                                                         | 0.11575  |
| 123B ->128B                                                         | 0.84592  |
| 123B ->129B                                                         | 0.16562  |
| 123B ->130B                                                         | -0.13644 |
| Excited State 11: 3.370-A 3.8644 eV 320.83 nm f=0.0001 <S**2>=2.589 |          |
| 118A ->129A                                                         | -0.14763 |
| 119A ->129A                                                         | 0.11660  |
| 120A ->130A                                                         | 0.21313  |
| 121A ->129A                                                         | -0.11253 |
| 122A ->131A                                                         | -0.18550 |
| 123A ->131A                                                         | 0.11521  |
| 123A ->132A                                                         | -0.34849 |
| 125A ->132A                                                         | 0.10889  |
| 126A ->133A                                                         | -0.10369 |
| 127A ->129A                                                         | -0.11808 |
| 128A ->129A                                                         | -0.32165 |
| 128A ->134A                                                         | -0.11374 |
| 118B ->129B                                                         | -0.19359 |
| 119B ->130B                                                         | -0.22022 |
| 122B ->131B                                                         | 0.18045  |
| 123B ->128B                                                         | 0.22023  |
| 123B ->131B                                                         | -0.12745 |
| 123B ->132B                                                         | 0.36577  |
| 126B ->133B                                                         | 0.10551  |
| 127B ->129B                                                         | 0.22140  |
| 127B ->134B                                                         | 0.11057  |
| Excited State 12: 3.432-A 3.8728 eV 320.14 nm f=0.0001 <S**2>=2.694 |          |
| 118A ->130A                                                         | 0.15947  |
| 119A ->130A                                                         | -0.15449 |
| 120A ->129A                                                         | -0.23991 |
| 122A ->131A                                                         | 0.26195  |
| 122A ->132A                                                         | 0.17859  |
| 123A ->131A                                                         | 0.19244  |
| 123A ->132A                                                         | -0.20836 |
| 125A ->132A                                                         | 0.10693  |
| 128A ->129A                                                         | 0.30898  |
| 128A ->130A                                                         | 0.14877  |
| 118B ->130B                                                         | 0.20325  |
| 119B ->129B                                                         | 0.25158  |
| 122B ->131B                                                         | -0.26875 |
| 122B ->132B                                                         | -0.16828 |
| 123B ->128B                                                         | 0.10898  |
| 123B ->131B                                                         | -0.19084 |
| 123B ->132B                                                         | 0.22693  |
| 127B ->129B                                                         | -0.22608 |
| 127B ->130B                                                         | -0.10165 |
| Excited State 13: 2.939-A 3.9249 eV 315.89 nm f=0.0011 <S**2>=1.909 |          |

|                                                                     |          |
|---------------------------------------------------------------------|----------|
| 119A ->129A                                                         | 0.10815  |
| 120A ->130A                                                         | 0.12210  |
| 122A ->131A                                                         | -0.24010 |
| 122A ->132A                                                         | -0.10403 |
| 126A ->131A                                                         | 0.12331  |
| 128A ->129A                                                         | 0.76342  |
| 128A ->130A                                                         | 0.23308  |
| 118B ->129B                                                         | -0.10426 |
| 119B ->130B                                                         | -0.13205 |
| 122B ->131B                                                         | 0.24109  |
| 122B ->132B                                                         | 0.10638  |
| 126B ->131B                                                         | -0.13146 |
| 127B ->129B                                                         | 0.10061  |
| Excited State 14: 2.728-A 3.9391 eV 314.75 nm f=0.0015 <S**2>=1.611 |          |
| 122A ->131A                                                         | 0.16184  |
| 126A ->131A                                                         | -0.10422 |
| 128A ->129A                                                         | 0.16419  |
| 122B ->131B                                                         | -0.15976 |
| 127B ->129B                                                         | 0.84209  |
| 127B ->130B                                                         | 0.23945  |
| Excited State 15: 2.763-A 4.0153 eV 308.78 nm f=0.0009 <S**2>=1.659 |          |
| 123A ->129A                                                         | 0.25218  |
| 123A ->130A                                                         | -0.23419 |
| 125A ->129A                                                         | -0.12337 |
| 127A ->129A                                                         | 0.68119  |
| 128A ->130A                                                         | 0.11463  |
| 122B ->128B                                                         | 0.29979  |
| 123B ->128B                                                         | 0.18321  |
| 123B ->129B                                                         | -0.27155 |
| 123B ->130B                                                         | 0.24478  |
| 125B ->129B                                                         | 0.10418  |
| 127B ->130B                                                         | -0.14577 |
| Excited State 16: 2.638-A 4.0447 eV 306.54 nm f=0.0003 <S**2>=1.490 |          |
| 123A ->129A                                                         | -0.22390 |
| 123A ->130A                                                         | 0.12797  |
| 125A ->130A                                                         | -0.12087 |
| 127A ->129A                                                         | 0.63226  |
| 128A ->130A                                                         | -0.23384 |
| 121B ->128B                                                         | 0.17306  |
| 122B ->128B                                                         | -0.45320 |
| 123B ->128B                                                         | -0.11388 |
| 123B ->129B                                                         | 0.21145  |
| 123B ->130B                                                         | -0.14433 |
| 127B ->130B                                                         | 0.15700  |
| Excited State 17: 2.942-A 4.0584 eV 305.50 nm f=0.0001 <S**2>=1.914 |          |
| 122A ->129A                                                         | -0.10069 |
| 122A ->130A                                                         | -0.11570 |
| 128A ->130A                                                         | -0.33943 |
| 128A ->131A                                                         | 0.22794  |
| 128A ->133A                                                         | 0.28134  |
| 128A ->134A                                                         | 0.10741  |
| 121B ->128B                                                         | -0.12798 |
| 122B ->128B                                                         | 0.61514  |
| 122B ->130B                                                         | 0.11814  |
| 127B ->130B                                                         | 0.29166  |
| 127B ->131B                                                         | -0.22779 |
| 127B ->133B                                                         | -0.28488 |
| 127B ->134B                                                         | -0.10467 |
| Excited State 18: 3.017-A 4.0698 eV 304.64 nm f=0.0003 <S**2>=2.026 |          |
| 123A ->129A                                                         | -0.24964 |
| 123A ->130A                                                         | 0.20986  |
| 125A ->129A                                                         | 0.10519  |
| 125A ->130A                                                         | -0.10260 |
| 127A ->129A                                                         | 0.16965  |
| 128A ->130A                                                         | 0.14628  |
| 128A ->131A                                                         | -0.23587 |
| 128A ->133A                                                         | -0.28458 |
| 128A ->134A                                                         | -0.10586 |
| 122B ->128B                                                         | 0.49521  |
| 123B ->128B                                                         | -0.18710 |
| 123B ->129B                                                         | 0.24608  |
| 123B ->130B                                                         | -0.22218 |
| 127B ->130B                                                         | -0.13050 |
| 127B ->131B                                                         | 0.23337  |
| 127B ->133B                                                         | 0.28085  |
| 127B ->134B                                                         | 0.10302  |
| Excited State 19: 3.335-A 4.1445 eV 299.15 nm f=0.0002 <S**2>=2.530 |          |
| 122A ->129A                                                         | 0.36563  |
| 122A ->130A                                                         | 0.35065  |
| 123A ->130A                                                         | 0.13235  |
| 125A ->129A                                                         | 0.11671  |

|                                                                     |          |
|---------------------------------------------------------------------|----------|
| 126A ->129A                                                         | -0.24265 |
| 126A ->130A                                                         | -0.16224 |
| 127A ->129A                                                         | 0.11915  |
| 127A ->130A                                                         | -0.26302 |
| 128A ->130A                                                         | -0.19509 |
| 128A ->133A                                                         | 0.10954  |
| 122B ->129B                                                         | -0.36462 |
| 122B ->130B                                                         | -0.33531 |
| 123B ->130B                                                         | -0.10999 |
| 126B ->129B                                                         | 0.22440  |
| 126B ->130B                                                         | 0.16477  |
| 127B ->129B                                                         | 0.16582  |
| 127B ->133B                                                         | -0.11049 |
| Excited State 20: 2.248-A 4.1617 eV 297.92 nm f=0.0007 <S**2>=1.014 |          |
| 127A ->130A                                                         | 0.15673  |
| 128A ->129A                                                         | -0.31562 |
| 128A ->130A                                                         | 0.72044  |
| 128A ->133A                                                         | 0.11413  |
| 127B ->130B                                                         | 0.50534  |
| 127B ->131B                                                         | -0.12142 |
| 127B ->133B                                                         | -0.12953 |
| Excited State 21: 3.060-A 4.2038 eV 294.93 nm f=0.0007 <S**2>=2.091 |          |
| 127A ->130A                                                         | -0.45442 |
| 128A ->129A                                                         | 0.14211  |
| 128A ->130A                                                         | -0.17888 |
| 128A ->131A                                                         | -0.19292 |
| 128A ->133A                                                         | -0.22188 |
| 127B ->129B                                                         | -0.28190 |
| 127B ->130B                                                         | 0.65865  |
| 127B ->131B                                                         | 0.17414  |
| 127B ->133B                                                         | 0.21764  |
| Excited State 22: 2.732-A 4.2364 eV 292.66 nm f=0.0012 <S**2>=1.616 |          |
| 122A ->129A                                                         | 0.11301  |
| 122A ->130A                                                         | 0.12852  |
| 125A ->129A                                                         | -0.10541 |
| 127A ->130A                                                         | 0.78224  |
| 128A ->130A                                                         | -0.32450 |
| 122B ->129B                                                         | -0.11260 |
| 122B ->130B                                                         | -0.11589 |
| 127B ->130B                                                         | 0.27429  |
| Excited State 23: 2.057-A 4.2825 eV 289.51 nm f=0.0780 <S**2>=0.808 |          |
| 127A ->129A                                                         | -0.17515 |
| 111B ->128B                                                         | 0.24267  |
| 113B ->128B                                                         | -0.49187 |
| 114B ->128B                                                         | 0.17031  |
| 118B ->128B                                                         | -0.14895 |
| 121B ->128B                                                         | 0.69603  |
| 124B ->128B                                                         | 0.11893  |
| 125B ->128B                                                         | -0.16525 |
| Excited State 24: 3.464-A 4.4668 eV 277.57 nm f=0.0000 <S**2>=2.750 |          |
| 126A ->129A                                                         | -0.20571 |
| 126A ->131A                                                         | -0.24906 |
| 126A ->133A                                                         | -0.42556 |
| 128A ->134A                                                         | 0.40795  |
| 126B ->129B                                                         | 0.17458  |
| 126B ->131B                                                         | 0.24694  |
| 126B ->133B                                                         | 0.42675  |
| 127B ->134B                                                         | -0.41050 |
| Excited State 25: 2.007-A 4.5685 eV 271.39 nm f=0.0142 <S**2>=0.758 |          |
| 128A ->131A                                                         | 0.65995  |
| 128A ->132A                                                         | 0.11642  |
| 127B ->131B                                                         | 0.69822  |
| 127B ->132B                                                         | 0.12741  |
| Excited State 26: 2.372-A 4.6178 eV 268.49 nm f=0.0120 <S**2>=1.157 |          |
| 126A ->129A                                                         | 0.71523  |
| 126A ->130A                                                         | 0.25632  |
| 125B ->129B                                                         | -0.27826 |
| 126B ->129B                                                         | 0.43691  |
| 126B ->130B                                                         | 0.16458  |
| 127B ->131B                                                         | -0.15048 |
| Excited State 27: 3.111-A 4.6257 eV 268.04 nm f=0.0094 <S**2>=2.169 |          |
| 118A ->129A                                                         | 0.11798  |
| 119A ->129A                                                         | -0.10721 |
| 120A ->130A                                                         | -0.17258 |
| 121A ->129A                                                         | 0.10725  |
| 122A ->131A                                                         | -0.11770 |
| 123A ->132A                                                         | -0.18332 |
| 125A ->129A                                                         | -0.16606 |
| 126A ->129A                                                         | 0.14043  |

|             |          |
|-------------|----------|
| 126A ->130A | 0.10464  |
| 128A ->131A | -0.19061 |
| 128A ->133A | 0.11537  |
| 118B ->129B | 0.14946  |
| 119B ->130B | 0.18299  |
| 121B ->129B | -0.10870 |
| 122B ->131B | 0.11505  |
| 123B ->132B | 0.18671  |
| 125B ->129B | 0.54053  |
| 126B ->129B | 0.44561  |
| 126B ->130B | 0.13008  |
| 127B ->133B | -0.10838 |

Excited State 28: 3.389-A 4.6587 eV 266.13 nm f=0.0008 <S\*\*2>=2.621

|             |          |
|-------------|----------|
| 118A ->130A | 0.16632  |
| 119A ->130A | -0.15650 |
| 120A ->129A | -0.29219 |
| 121A ->129A | -0.12522 |
| 121A ->130A | 0.12763  |
| 122A ->131A | -0.11308 |
| 123A ->131A | -0.15622 |
| 123A ->132A | 0.21297  |
| 124A ->129A | -0.14774 |
| 125A ->129A | -0.12228 |
| 125A ->132A | -0.10071 |
| 126A ->130A | -0.11560 |
| 128A ->131A | -0.22037 |
| 128A ->132A | -0.14592 |
| 128A ->133A | 0.13310  |
| 118B ->128B | -0.16420 |
| 118B ->130B | 0.20943  |
| 119B ->128B | 0.12271  |
| 119B ->129B | 0.29298  |
| 121B ->130B | -0.11187 |
| 122B ->131B | 0.11579  |
| 123B ->131B | 0.15754  |
| 123B ->132B | -0.22635 |
| 124B ->129B | 0.17986  |
| 125B ->129B | 0.14436  |
| 125B ->130B | 0.17297  |
| 126B ->130B | 0.12762  |
| 127B ->131B | 0.16944  |
| 127B ->132B | 0.14227  |
| 127B ->133B | -0.13136 |

Excited State 29: 3.200-A 4.6911 eV 264.30 nm f=0.0003 <S\*\*2>=2.310

|             |          |
|-------------|----------|
| 128A ->131A | 0.42228  |
| 128A ->132A | 0.12851  |
| 128A ->133A | -0.28586 |
| 128A ->134A | -0.10051 |
| 125B ->129B | 0.54340  |
| 127B ->131B | -0.41132 |
| 127B ->132B | -0.12851 |
| 127B ->133B | 0.29912  |

Excited State 30: 3.287-A 4.6980 eV 263.91 nm f=0.0002 <S\*\*2>=2.451

|             |          |
|-------------|----------|
| 122A ->129A | -0.17726 |
| 122A ->130A | -0.15379 |
| 125A ->129A | -0.20746 |
| 126A ->129A | -0.41088 |
| 126A ->130A | -0.17824 |
| 126A ->133A | 0.12239  |
| 128A ->131A | 0.10966  |
| 122B ->129B | 0.18806  |
| 122B ->130B | 0.14550  |
| 124B ->129B | 0.15314  |
| 125B ->129B | -0.35282 |
| 126B ->129B | 0.56166  |
| 126B ->130B | 0.20246  |
| 126B ->133B | -0.12111 |
| 127B ->131B | -0.10280 |
| 127B ->134B | 0.10289  |

Phenolate form, equatorial phenolate, exogeneous ligand = chloride:

Excited State 1: 2.003-A 1.1607 eV 1068.17 nm f=0.0014 <S\*\*2>=0.753

|             |          |
|-------------|----------|
| 109B ->128B | 0.22734  |
| 110B ->128B | -0.18248 |
| 118B ->128B | 0.17271  |
| 122B ->128B | 0.33540  |
| 124B ->128B | 0.17957  |
| 125B ->128B | 0.63765  |
| 127B ->128B | 0.52455  |

This state for optimization and/or second-order correction.

Total Energy, E(TD-HF/TD-KS) = -3310.79830182

Copying the excited state density for this state as the 1-particle RhoCI density.

Excited State 2: 2.003-A 1.5385 eV 805.90 nm f=0.0007 <S\*\*2>=0.753

|             |          |
|-------------|----------|
| 108B ->128B | 0.15847  |
| 109B ->128B | -0.14946 |
| 110B ->128B | -0.25539 |
| 113B ->128B | 0.10719  |
| 114B ->128B | -0.13324 |
| 116B ->128B | 0.19343  |
| 117B ->128B | 0.11678  |
| 118B ->128B | -0.40446 |
| 120B ->128B | -0.29288 |
| 124B ->128B | 0.57208  |
| 125B ->128B | 0.19665  |
| 127B ->128B | -0.37733 |

Excited State 3: 2.002-A 1.7871 eV 693.78 nm f=0.0050 <S\*\*2>=0.752

|             |          |
|-------------|----------|
| 107B ->128B | -0.24829 |
| 108B ->128B | -0.24549 |
| 109B ->128B | 0.11029  |
| 110B ->128B | -0.13714 |
| 111B ->128B | -0.12749 |
| 112B ->128B | 0.18224  |
| 113B ->128B | -0.25842 |
| 114B ->128B | 0.10853  |
| 115B ->128B | 0.12406  |
| 116B ->128B | 0.42603  |
| 117B ->128B | 0.15120  |
| 120B ->128B | -0.28849 |
| 121B ->128B | -0.13263 |
| 122B ->128B | -0.42471 |
| 123B ->128B | -0.22568 |
| 124B ->128B | -0.20713 |
| 125B ->128B | 0.27901  |

Excited State 4: 2.001-A 1.8742 eV 661.53 nm f=0.0027 <S\*\*2>=0.751

|             |          |
|-------------|----------|
| 107B ->128B | 0.32790  |
| 108B ->128B | 0.23988  |
| 110B ->128B | 0.13438  |
| 111B ->128B | 0.11371  |
| 112B ->128B | -0.10571 |
| 113B ->128B | 0.31968  |
| 116B ->128B | 0.43363  |
| 117B ->128B | 0.12194  |
| 118B ->128B | 0.49306  |
| 122B ->128B | -0.28404 |
| 123B ->128B | 0.24817  |
| 124B ->128B | 0.15828  |

Excited State 5: 2.031-A 2.2660 eV 547.16 nm f=0.0433 <S\*\*2>=0.781

|             |          |
|-------------|----------|
| 109B ->128B | -0.21773 |
| 114B ->128B | -0.16545 |
| 116B ->128B | 0.12198  |
| 117B ->128B | 0.14660  |
| 118B ->128B | -0.35376 |
| 120B ->128B | -0.12899 |
| 122B ->128B | -0.18960 |
| 125B ->128B | -0.32632 |
| 127B ->128B | 0.74259  |

Excited State 6: 3.193-A 2.8149 eV 440.46 nm f=0.0012 <S\*\*2>=2.298

|             |          |
|-------------|----------|
| 128A ->129A | 0.90574  |
| 127B ->129B | -0.38698 |

Excited State 7: 2.301-A 2.8533 eV 434.52 nm f=0.0115 <S\*\*2>=1.074

|             |         |
|-------------|---------|
| 128A ->129A | 0.39408 |
| 127B ->129B | 0.90789 |

Excited State 8: 3.276-A 3.2695 eV 379.22 nm f=0.0002 <S\*\*2>=2.433

|             |          |
|-------------|----------|
| 128A ->130A | 0.84772  |
| 127B ->130B | -0.46808 |

Excited State 9: 2.181-A 3.3010 eV 375.60 nm f=0.0051 <S\*\*2>=0.939

|             |         |
|-------------|---------|
| 128A ->130A | 0.48191 |
| 127B ->130B | 0.86094 |

Excited State 10: 2.020-A 3.3520 eV 369.88 nm f=0.0292 <S\*\*2>=0.770

|             |          |
|-------------|----------|
| 109B ->128B | -0.12769 |
| 118B ->128B | -0.24666 |
| 123B ->128B | 0.70787  |
| 124B ->128B | -0.52652 |
| 125B ->128B | 0.23122  |
| 126B ->128B | 0.18230  |

Excited State 11: 3.077-A 3.4163 eV 362.92 nm f=0.0005 <S\*\*2>=2.117

|             |          |
|-------------|----------|
| 126A ->133A | -0.11645 |
| 128A ->131A | -0.48218 |
| 128A ->133A | -0.29193 |

|                                                                     |          |
|---------------------------------------------------------------------|----------|
| 128A ->134A                                                         | 0.20229  |
| 126B ->128B                                                         | 0.51544  |
| 126B ->133B                                                         | 0.10997  |
| 127B ->131B                                                         | 0.42972  |
| 127B ->133B                                                         | 0.24119  |
| 127B ->134B                                                         | -0.21145 |
| Excited State 12: 2.530-A 3.4541 eV 358.95 nm f=0.0004 <S**2>=1.350 |          |
| 128A ->131A                                                         | 0.29586  |
| 128A ->134A                                                         | -0.19188 |
| 123B ->128B                                                         | -0.12271 |
| 125B ->128B                                                         | -0.11486 |
| 126B ->128B                                                         | 0.80858  |
| 127B ->131B                                                         | -0.34756 |
| 127B ->134B                                                         | 0.16605  |
| Excited State 13: 2.028-A 3.5255 eV 351.68 nm f=0.0035 <S**2>=0.779 |          |
| 127A ->129A                                                         | 0.17473  |
| 128A ->131A                                                         | 0.68232  |
| 127B ->131B                                                         | 0.68292  |
| Excited State 14: 2.404-A 3.5637 eV 347.91 nm f=0.0041 <S**2>=1.195 |          |
| 123A ->129A                                                         | 0.15683  |
| 127A ->129A                                                         | 0.93073  |
| 127B ->131B                                                         | -0.20521 |
| Excited State 15: 3.377-A 3.5826 eV 346.07 nm f=0.0013 <S**2>=2.601 |          |
| 126A ->133A                                                         | -0.27039 |
| 127A ->129A                                                         | -0.15931 |
| 128A ->131A                                                         | 0.32624  |
| 128A ->134A                                                         | 0.52294  |
| 126B ->133B                                                         | 0.26848  |
| 127B ->131B                                                         | -0.28942 |
| 127B ->133B                                                         | -0.10368 |
| 127B ->134B                                                         | -0.50614 |
| Excited State 16: 2.910-A 3.7004 eV 335.06 nm f=0.0058 <S**2>=1.866 |          |
| 128A ->131A                                                         | 0.18502  |
| 128A ->133A                                                         | -0.46802 |
| 107B ->128B                                                         | -0.10956 |
| 108B ->128B                                                         | -0.13032 |
| 113B ->128B                                                         | -0.11790 |
| 116B ->128B                                                         | -0.14670 |
| 120B ->128B                                                         | 0.24308  |
| 122B ->128B                                                         | -0.32305 |
| 123B ->128B                                                         | 0.26090  |
| 124B ->128B                                                         | 0.29657  |
| 125B ->128B                                                         | 0.10028  |
| 127B ->131B                                                         | -0.22198 |
| 127B ->133B                                                         | 0.47146  |
| Excited State 17: 2.695-A 3.7138 eV 333.84 nm f=0.0113 <S**2>=1.565 |          |
| 128A ->131A                                                         | -0.20923 |
| 128A ->133A                                                         | 0.40688  |
| 107B ->128B                                                         | -0.13131 |
| 108B ->128B                                                         | -0.15852 |
| 113B ->128B                                                         | -0.13713 |
| 116B ->128B                                                         | -0.17753 |
| 120B ->128B                                                         | 0.28407  |
| 122B ->128B                                                         | -0.37242 |
| 123B ->128B                                                         | 0.29866  |
| 124B ->128B                                                         | 0.35579  |
| 126B ->128B                                                         | 0.13031  |
| 127B ->131B                                                         | 0.16208  |
| 127B ->133B                                                         | -0.39611 |
| Excited State 18: 2.113-A 3.7437 eV 331.18 nm f=0.0348 <S**2>=0.866 |          |
| 107B ->128B                                                         | 0.21951  |
| 108B ->128B                                                         | 0.22052  |
| 109B ->128B                                                         | -0.21906 |
| 112B ->128B                                                         | -0.14112 |
| 113B ->128B                                                         | 0.16941  |
| 114B ->128B                                                         | -0.11909 |
| 116B ->128B                                                         | -0.12183 |
| 118B ->128B                                                         | -0.17722 |
| 120B ->128B                                                         | 0.30803  |
| 122B ->128B                                                         | -0.40330 |
| 123B ->128B                                                         | -0.42069 |
| 124B ->128B                                                         | -0.17066 |
| 125B ->128B                                                         | 0.43611  |
| Excited State 19: 3.417-A 3.8016 eV 326.14 nm f=0.0018 <S**2>=2.668 |          |
| 115A ->129A                                                         | -0.10530 |
| 118A ->129A                                                         | -0.18289 |
| 118A ->130A                                                         | -0.19482 |
| 118A ->131A                                                         | -0.12162 |
| 120A ->132A                                                         | -0.15220 |



|             |          |
|-------------|----------|
| 121A ->129A | 0.11683  |
| 122A ->130A | -0.17470 |
| 122A ->131A | 0.25106  |
| 122A ->132A | 0.29296  |
| 128A ->132A | 0.16586  |
| 116B ->129B | -0.10755 |
| 117B ->129B | 0.16163  |
| 117B ->130B | 0.16422  |
| 117B ->131B | 0.11417  |
| 118B ->130B | -0.10449 |
| 119B ->131B | 0.12600  |
| 119B ->132B | -0.16960 |
| 121B ->129B | -0.11446 |
| 121B ->130B | -0.18472 |
| 121B ->131B | 0.24583  |
| 121B ->132B | 0.29686  |
| 122B ->129B | -0.10746 |
| 124B ->129B | -0.11240 |
| 125B ->129B | -0.23218 |
| 127B ->132B | -0.13520 |

Excited State 20: 3.426-A 3.8690 eV 320.45 nm f=0.0018 <S\*\*2>=2.684

|             |          |
|-------------|----------|
| 114A ->129A | 0.14163  |
| 115A ->129A | -0.15130 |
| 117A ->129A | -0.17474 |
| 118A ->130A | 0.19905  |
| 119A ->131A | 0.19413  |
| 120A ->130A | -0.11756 |
| 120A ->131A | 0.27837  |
| 122A ->132A | -0.29048 |
| 123A ->129A | 0.11187  |
| 109B ->129B | -0.12421 |
| 113B ->129B | 0.14919  |
| 114B ->130B | -0.10330 |
| 117B ->130B | -0.17094 |
| 118B ->129B | 0.17140  |
| 119B ->129B | -0.13117 |
| 119B ->130B | -0.13549 |
| 119B ->131B | 0.33169  |
| 121B ->132B | -0.29298 |
| 122B ->129B | -0.10847 |
| 124B ->129B | -0.20449 |

Excited State 21: 3.154-A 3.9184 eV 316.41 nm f=0.0024 <S\*\*2>=2.237

|             |          |
|-------------|----------|
| 125A ->129A | -0.15547 |
| 128A ->132A | 0.25491  |
| 122B ->129B | 0.11190  |
| 124B ->129B | 0.26868  |
| 125B ->129B | 0.78378  |
| 125B ->130B | 0.13319  |
| 127B ->132B | -0.15185 |

Excited State 22: 2.036-A 3.9541 eV 313.56 nm f=0.0016 <S\*\*2>=0.787

|             |         |
|-------------|---------|
| 128A ->132A | 0.65015 |
| 127B ->132B | 0.74829 |

Excited State 23: 3.366-A 3.9659 eV 312.63 nm f=0.0002 <S\*\*2>=2.583

|             |          |
|-------------|----------|
| 122A ->130A | 0.10085  |
| 128A ->132A | 0.65604  |
| 125B ->129B | -0.21652 |
| 126B ->129B | -0.10493 |
| 127B ->132B | -0.58270 |

Excited State 24: 3.438-A 4.0749 eV 304.26 nm f=0.0002 <S\*\*2>=2.705

|             |          |
|-------------|----------|
| 120A ->130A | -0.12310 |
| 122A ->129A | 0.37260  |
| 122A ->130A | 0.29455  |
| 122A ->131A | 0.22985  |
| 125A ->129A | -0.13475 |
| 126A ->129A | 0.31338  |
| 126A ->130A | 0.13588  |
| 128A ->132A | -0.11985 |
| 119B ->130B | -0.13449 |
| 121B ->129B | 0.37737  |
| 121B ->130B | 0.28884  |
| 121B ->131B | 0.23517  |
| 126B ->129B | -0.31198 |
| 126B ->130B | -0.12558 |
| 127B ->132B | 0.13337  |

Excited State 25: 2.521-A 4.1208 eV 300.87 nm f=0.0008 <S\*\*2>=1.339

|             |          |
|-------------|----------|
| 123A ->129A | -0.17421 |
| 125A ->129A | 0.14439  |
| 127A ->129A | 0.10100  |
| 127A ->130A | 0.90351  |
| 124B ->129B | 0.22632  |

Excited State 26: 3.356-A 4.1566 eV 298.28 nm f=0.0000 <S\*\*2>=2.566

|             |          |
|-------------|----------|
| 119A ->129A | 0.23443  |
| 120A ->129A | 0.34986  |
| 120A ->130A | -0.13615 |
| 122A ->129A | 0.22107  |
| 124A ->129A | 0.20432  |
| 126A ->129A | -0.36405 |
| 127A ->130A | 0.18006  |
| 119B ->128B | 0.15901  |
| 119B ->129B | 0.38664  |
| 119B ->130B | -0.16750 |
| 121B ->128B | 0.23815  |
| 121B ->129B | 0.20232  |
| 123B ->129B | -0.22319 |
| 126B ->129B | 0.29418  |

Excited State 27: 2.937-A 4.1729 eV 297.12 nm f=0.0034 <S\*\*2>=1.907

|             |          |
|-------------|----------|
| 125A ->129A | -0.35633 |
| 125A ->130A | -0.10481 |
| 126A ->129A | -0.10758 |
| 127A ->130A | -0.14701 |
| 124B ->129B | 0.69077  |
| 124B ->130B | 0.10327  |
| 125B ->129B | -0.43874 |
| 125B ->130B | 0.17404  |

Excited State 28: 2.554-A 4.1877 eV 296.07 nm f=0.0051 <S\*\*2>=1.381

|             |          |
|-------------|----------|
| 121A ->129A | 0.17237  |
| 121A ->130A | 0.11336  |
| 125A ->129A | 0.66456  |
| 125A ->130A | 0.11374  |
| 127A ->130A | -0.25029 |
| 121B ->128B | 0.13167  |
| 124B ->129B | 0.49148  |
| 125B ->130B | -0.17354 |
| 126B ->129B | -0.12334 |

Excited State 29: 2.036-A 4.2263 eV 293.37 nm f=0.0168 <S\*\*2>=0.786

|             |         |
|-------------|---------|
| 126A ->129A | 0.72859 |
| 126B ->129B | 0.65332 |

Excited State 30: 3.159-A 4.2417 eV 292.30 nm f=0.0010 <S\*\*2>=2.245

|             |          |
|-------------|----------|
| 119A ->129A | -0.10524 |
| 120A ->129A | -0.14807 |
| 122A ->129A | 0.15724  |
| 122A ->130A | 0.26517  |
| 122A ->131A | 0.12049  |
| 125A ->129A | 0.22039  |
| 126A ->129A | -0.30170 |
| 126A ->133A | 0.18551  |
| 128A ->134A | 0.15775  |
| 119B ->129B | -0.16626 |
| 121B ->128B | -0.43691 |
| 121B ->129B | 0.14934  |
| 121B ->130B | 0.24278  |
| 121B ->131B | 0.11939  |
| 123B ->129B | 0.11558  |
| 126B ->129B | 0.45948  |
| 126B ->133B | -0.18431 |
| 127B ->134B | -0.14247 |

## Phenol form, axial phenol, exogeneous ligand = water

Excited State 1: 2.002-A 1.5979 eV 775.92 nm f=0.0008 <S\*\*2>=0.752

|             |          |
|-------------|----------|
| 103B ->124B | 0.13264  |
| 104B ->124B | 0.14748  |
| 109B ->124B | -0.33367 |
| 112B ->124B | -0.10853 |
| 113B ->124B | -0.13251 |
| 116B ->124B | -0.15954 |
| 119B ->124B | 0.77936  |
| 123B ->124B | 0.35258  |

This state for optimization and/or second-order correction.

Total Energy, E(TD-HF/TD-KS) = -2927.25643912

Copying the excited state density for this state as the 1-particle RhoCI density.

Excited State 2: 2.003-A 1.9526 eV 634.98 nm f=0.0017 <S\*\*2>=0.753

|             |          |
|-------------|----------|
| 98B ->124B  | 0.12742  |
| 108B ->124B | 0.30841  |
| 109B ->124B | -0.18471 |
| 110B ->124B | 0.20665  |
| 111B ->124B | -0.12565 |
| 112B ->124B | 0.17071  |
| 113B ->124B | 0.60391  |
| 114B ->124B | 0.13607  |

|                                                                     |          |
|---------------------------------------------------------------------|----------|
| 117B ->124B                                                         | 0.24005  |
| 118B ->124B                                                         | 0.26571  |
| 119B ->124B                                                         | 0.21896  |
| 123B ->124B                                                         | -0.38608 |
| Excited State 3: 2.001-A 1.9909 eV 622.76 nm f=0.0002 <S**2>=0.751  |          |
| 105B ->124B                                                         | -0.13368 |
| 108B ->124B                                                         | 0.59031  |
| 109B ->124B                                                         | 0.19824  |
| 110B ->124B                                                         | -0.10278 |
| 111B ->124B                                                         | 0.14653  |
| 112B ->124B                                                         | -0.29067 |
| 113B ->124B                                                         | -0.27991 |
| 117B ->124B                                                         | -0.26822 |
| 118B ->124B                                                         | 0.49691  |
| Excited State 4: 2.009-A 2.1947 eV 564.93 nm f=0.0005 <S**2>=0.759  |          |
| 105B ->124B                                                         | -0.17554 |
| 108B ->124B                                                         | 0.14084  |
| 112B ->124B                                                         | 0.14169  |
| 113B ->124B                                                         | 0.26919  |
| 117B ->124B                                                         | 0.12087  |
| 118B ->124B                                                         | 0.20398  |
| 119B ->124B                                                         | -0.21111 |
| 122B ->124B                                                         | -0.10710 |
| 123B ->124B                                                         | 0.83307  |
| Excited State 5: 2.002-A 2.3481 eV 528.03 nm f=0.0012 <S**2>=0.752  |          |
| 96B ->124B                                                          | 0.11286  |
| 97B ->124B                                                          | -0.14127 |
| 99B ->124B                                                          | 0.10617  |
| 100B ->124B                                                         | 0.40238  |
| 101B ->124B                                                         | -0.10312 |
| 103B ->124B                                                         | -0.32427 |
| 104B ->124B                                                         | -0.25670 |
| 105B ->124B                                                         | 0.64056  |
| 108B ->124B                                                         | 0.26969  |
| 112B ->124B                                                         | -0.22459 |
| 113B ->124B                                                         | 0.14165  |
| 123B ->124B                                                         | 0.14319  |
| Excited State 6: 2.011-A 2.7932 eV 443.88 nm f=0.0002 <S**2>=0.761  |          |
| 122B ->124B                                                         | 0.98756  |
| Excited State 7: 2.011-A 3.3889 eV 365.86 nm f=0.0002 <S**2>=0.761  |          |
| 121B ->124B                                                         | 0.99704  |
| Excited State 8: 3.462-A 3.5360 eV 350.63 nm f=0.0000 <S**2>=2.747  |          |
| 123A ->127A                                                         | -0.12120 |
| 123A ->129A                                                         | -0.28772 |
| 123A ->130A                                                         | 0.10863  |
| 124A ->125A                                                         | 0.40153  |
| 124A ->127A                                                         | 0.10109  |
| 124A ->129A                                                         | 0.25089  |
| 124A ->130A                                                         | 0.26238  |
| 124A ->131A                                                         | -0.29028 |
| 122B ->127B                                                         | 0.11972  |
| 122B ->129B                                                         | 0.29088  |
| 122B ->130B                                                         | -0.10075 |
| 123B ->125B                                                         | -0.34979 |
| 123B ->127B                                                         | -0.10011 |
| 123B ->129B                                                         | -0.24501 |
| 123B ->130B                                                         | -0.31346 |
| 123B ->131B                                                         | 0.24090  |
| Excited State 9: 2.022-A 3.6165 eV 342.83 nm f=0.0002 <S**2>=0.772  |          |
| 119B ->124B                                                         | -0.11395 |
| 120B ->124B                                                         | 0.98283  |
| Excited State 10: 2.249-A 3.7043 eV 334.70 nm f=0.0019 <S**2>=1.015 |          |
| 124A ->125A                                                         | 0.82062  |
| 124A ->126A                                                         | 0.23908  |
| 123B ->125B                                                         | 0.44345  |
| 123B ->126B                                                         | 0.12627  |
| Excited State 11: 3.309-A 3.7316 eV 332.26 nm f=0.0003 <S**2>=2.487 |          |
| 123A ->129A                                                         | -0.21544 |
| 124A ->125A                                                         | -0.27769 |
| 124A ->130A                                                         | 0.16953  |
| 124A ->131A                                                         | -0.16047 |
| 122B ->129B                                                         | 0.21517  |
| 123B ->125B                                                         | 0.76970  |
| 123B ->126B                                                         | 0.21398  |
| 123B ->130B                                                         | -0.20361 |
| 123B ->131B                                                         | 0.13446  |
| Excited State 12: 3.462-A 3.8304 eV 323.68 nm f=0.0000 <S**2>=2.746 |          |

|             |          |
|-------------|----------|
| 117A ->126A | 0.12933  |
| 119A ->125A | 0.17686  |
| 119A ->126A | -0.17125 |
| 121A ->125A | 0.25854  |
| 121A ->126A | -0.21321 |
| 121A ->127A | 0.23869  |
| 121A ->128A | 0.37143  |
| 122A ->125A | 0.12546  |
| 122A ->126A | -0.10329 |
| 122A ->128A | 0.13227  |
| 124A ->126A | -0.11129 |
| 117B ->125B | -0.10178 |
| 117B ->126B | 0.12894  |
| 118B ->125B | -0.18365 |
| 118B ->126B | 0.17492  |
| 121B ->125B | 0.28060  |
| 121B ->126B | -0.22812 |
| 121B ->127B | 0.25117  |
| 121B ->128B | 0.39718  |
| 123B ->126B | 0.10193  |

Excited State 13: 3.456-A 3.9209 eV 316.22 nm f=0.0001 <S\*\*2>=2.735

|             |          |
|-------------|----------|
| 117A ->125A | 0.21582  |
| 117A ->126A | 0.16773  |
| 119A ->125A | 0.16469  |
| 119A ->126A | 0.17487  |
| 120A ->127A | -0.39976 |
| 120A ->128A | 0.26183  |
| 121A ->128A | -0.10562 |
| 123A ->127A | 0.14011  |
| 124A ->125A | 0.12857  |
| 124A ->126A | -0.23251 |
| 117B ->125B | 0.20287  |
| 117B ->126B | 0.15409  |
| 118B ->125B | -0.15979 |
| 118B ->126B | -0.17898 |
| 120B ->127B | 0.40169  |
| 120B ->128B | -0.26476 |
| 122B ->127B | -0.13995 |
| 123B ->125B | -0.11565 |
| 123B ->126B | 0.14630  |

Excited State 14: 3.400-A 3.9413 eV 314.58 nm f=0.0003 <S\*\*2>=2.641

|             |          |
|-------------|----------|
| 120A ->127A | -0.13898 |
| 120A ->128A | 0.11132  |
| 121A ->127A | 0.10381  |
| 124A ->125A | -0.15378 |
| 124A ->126A | 0.71517  |
| 124A ->127A | -0.15431 |
| 124A ->129A | -0.15890 |
| 124A ->130A | 0.10151  |
| 120B ->127B | 0.14234  |
| 120B ->128B | -0.10908 |
| 123B ->126B | -0.40698 |
| 123B ->127B | 0.14429  |
| 123B ->129B | 0.15919  |
| 123B ->130B | -0.10099 |

Excited State 15: 2.120-A 3.9866 eV 311.00 nm f=0.0035 <S\*\*2>=0.873

|             |          |
|-------------|----------|
| 124A ->125A | -0.16248 |
| 124A ->126A | 0.52749  |
| 123B ->125B | -0.21332 |
| 123B ->126B | 0.78858  |

Excited State 16: 3.461-A 4.0348 eV 307.29 nm f=0.0001 <S\*\*2>=2.745

|             |          |
|-------------|----------|
| 119A ->126A | -0.10032 |
| 120A ->125A | -0.15853 |
| 121A ->125A | -0.31713 |
| 121A ->126A | 0.38158  |
| 121A ->127A | 0.19297  |
| 121A ->128A | 0.20348  |
| 122A ->125A | -0.13423 |
| 122A ->126A | 0.11865  |
| 123A ->125A | 0.20325  |
| 124A ->127A | 0.13051  |
| 124A ->129A | 0.11872  |
| 118B ->126B | 0.10201  |
| 120B ->125B | 0.14547  |
| 121B ->125B | -0.34147 |
| 121B ->126B | 0.38417  |
| 121B ->127B | 0.20582  |
| 121B ->128B | 0.21458  |
| 122B ->125B | -0.18484 |
| 123B ->127B | -0.13373 |
| 123B ->129B | -0.12090 |

Excited State 17: 3.458-A 4.0642 eV 305.06 nm f=0.0000 <S\*\*2>=2.739

|             |          |
|-------------|----------|
| 120A ->125A | 0.40182  |
| 120A ->126A | 0.35061  |
| 121A ->125A | -0.21066 |
| 123A ->125A | -0.31652 |
| 123A ->126A | -0.22572 |
| 120B ->125B | -0.39773 |
| 120B ->126B | -0.34476 |
| 121B ->125B | -0.18549 |
| 122B ->125B | 0.28523  |
| 122B ->126B | 0.20870  |
| 123B ->126B | 0.11066  |

Excited State 18: 3.460-A 4.1305 eV 300.17 nm f=0.0000 <S\*\*2>=2.743

|             |          |
|-------------|----------|
| 121A ->125A | -0.10101 |
| 124A ->125A | 0.12399  |
| 124A ->126A | -0.24665 |
| 124A ->127A | -0.39168 |
| 124A ->129A | -0.39579 |
| 124A ->130A | 0.17530  |
| 121B ->125B | -0.10623 |
| 121B ->126B | 0.10107  |
| 123B ->125B | -0.14142 |
| 123B ->126B | 0.30336  |
| 123B ->127B | 0.38445  |
| 123B ->129B | 0.39883  |
| 123B ->130B | -0.16933 |

Excited State 19: 2.038-A 4.3415 eV 285.58 nm f=0.0079 <S\*\*2>=0.788

|             |         |
|-------------|---------|
| 123A ->125A | 0.72201 |
| 123A ->126A | 0.20895 |
| 122B ->125B | 0.60199 |
| 122B ->126B | 0.20041 |

Excited State 20: 2.493-A 4.3937 eV 282.19 nm f=0.0066 <S\*\*2>=1.303

|             |          |
|-------------|----------|
| 120A ->125A | 0.17072  |
| 122A ->125A | -0.18660 |
| 123A ->125A | 0.26684  |
| 123A ->129A | 0.11093  |
| 124A ->127A | -0.22627 |
| 124A ->130A | 0.10415  |
| 109B ->124B | 0.17477  |
| 113B ->124B | -0.20257 |
| 116B ->124B | 0.15090  |
| 117B ->124B | 0.59730  |
| 118B ->124B | 0.18013  |
| 119B ->124B | 0.15438  |
| 120B ->125B | -0.12346 |
| 122B ->125B | -0.23508 |
| 122B ->129B | -0.11376 |
| 123B ->127B | -0.23371 |
| 123B ->130B | -0.11375 |

Excited State 21: 2.499-A 4.3992 eV 281.83 nm f=0.0073 <S\*\*2>=1.312

|             |          |
|-------------|----------|
| 120A ->125A | 0.13254  |
| 123A ->125A | 0.16497  |
| 123A ->129A | 0.14261  |
| 124A ->127A | 0.55932  |
| 124A ->128A | -0.13164 |
| 120B ->125B | -0.12799 |
| 122B ->125B | -0.33934 |
| 122B ->129B | -0.11184 |
| 123B ->127B | 0.57191  |
| 123B ->128B | -0.19824 |
| 123B ->130B | -0.13779 |

Excited State 22: 2.755-A 4.4012 eV 281.70 nm f=0.0050 <S\*\*2>=1.648

|             |          |
|-------------|----------|
| 120A ->125A | -0.14202 |
| 122A ->125A | -0.20509 |
| 123A ->125A | -0.25672 |
| 123A ->129A | -0.14661 |
| 124A ->127A | 0.28081  |
| 124A ->128A | -0.12335 |
| 124A ->130A | -0.15068 |
| 124A ->131A | 0.12174  |
| 109B ->124B | 0.10976  |
| 113B ->124B | -0.16726 |
| 116B ->124B | 0.10157  |
| 117B ->124B | 0.46633  |
| 118B ->124B | 0.16064  |
| 119B ->124B | 0.10228  |
| 120B ->125B | 0.16950  |
| 120B ->126B | 0.11166  |
| 122B ->125B | 0.38183  |
| 122B ->129B | 0.17061  |
| 123B ->127B | 0.28237  |
| 123B ->130B | 0.14803  |

Excited State 23: 3.453-A 4.4892 eV 276.19 nm f=0.0002 <S\*\*2>=2.730

|             |          |
|-------------|----------|
| 120A ->125A | 0.19574  |
| 120A ->126A | 0.14525  |
| 123A ->125A | 0.24515  |
| 123A ->126A | 0.27008  |
| 123A ->127A | -0.20151 |
| 123A ->129A | -0.33185 |
| 123A ->130A | 0.11087  |
| 124A ->128A | -0.11320 |
| 124A ->130A | -0.22671 |
| 124A ->131A | 0.19762  |
| 120B ->125B | -0.18624 |
| 120B ->126B | -0.14278 |
| 122B ->125B | -0.31505 |
| 122B ->126B | -0.26192 |
| 122B ->127B | 0.19872  |
| 122B ->129B | 0.33516  |
| 122B ->130B | -0.10184 |
| 123B ->128B | 0.11135  |
| 123B ->130B | 0.25763  |
| 123B ->131B | -0.15981 |

Excited State 24: 3.440-A 4.5301 eV 273.69 nm f=0.0002 <S\*\*2>=2.709

|             |          |
|-------------|----------|
| 122A ->125A | -0.13729 |
| 124A ->127A | 0.48119  |
| 124A ->128A | -0.22418 |
| 124A ->129A | -0.40089 |
| 124A ->130A | 0.16485  |
| 123B ->127B | -0.46161 |
| 123B ->128B | 0.22163  |
| 123B ->129B | 0.40453  |
| 123B ->130B | -0.16186 |

Excited State 25: 2.082-A 4.5345 eV 273.42 nm f=0.0092 <S\*\*2>=0.833

|             |          |
|-------------|----------|
| 121A ->125A | -0.11181 |
| 122A ->125A | 0.37996  |
| 122A ->126A | 0.14209  |
| 105B ->124B | 0.15826  |
| 108B ->124B | -0.30908 |
| 109B ->124B | -0.21476 |
| 112B ->124B | 0.22426  |
| 113B ->124B | -0.12975 |
| 114B ->124B | -0.10280 |
| 115B ->124B | -0.12525 |
| 116B ->124B | -0.32054 |
| 118B ->124B | 0.62984  |

Excited State 26: 2.262-A 4.5541 eV 272.25 nm f=0.0099 <S\*\*2>=1.029

|             |          |
|-------------|----------|
| 121A ->125A | -0.20454 |
| 122A ->125A | 0.76803  |
| 123A ->126A | 0.14103  |
| 109B ->124B | 0.28469  |
| 116B ->124B | 0.23691  |
| 117B ->124B | 0.17748  |
| 118B ->124B | -0.17025 |
| 119B ->124B | 0.18896  |

Excited State 27: 2.067-A 4.6177 eV 268.50 nm f=0.0113 <S\*\*2>=0.818

|             |          |
|-------------|----------|
| 122A ->125A | -0.13943 |
| 122A ->126A | 0.10192  |
| 123A ->126A | -0.16007 |
| 103B ->124B | -0.17377 |
| 104B ->124B | -0.17066 |
| 108B ->124B | -0.23122 |
| 109B ->124B | 0.45031  |
| 110B ->124B | -0.12286 |
| 112B ->124B | 0.31129  |
| 113B ->124B | 0.17798  |
| 115B ->124B | 0.23925  |
| 116B ->124B | 0.10422  |
| 117B ->124B | -0.37344 |
| 118B ->124B | 0.15621  |
| 119B ->124B | 0.39901  |

Excited State 28: 2.180-A 4.6265 eV 267.99 nm f=0.0010 <S\*\*2>=0.939

|             |          |
|-------------|----------|
| 122A ->125A | -0.12642 |
| 123A ->125A | -0.24541 |
| 123A ->126A | 0.73546  |
| 108B ->124B | -0.18002 |
| 117B ->124B | -0.11239 |
| 118B ->124B | 0.16380  |
| 122B ->125B | -0.13024 |
| 122B ->126B | 0.44890  |

Excited State 29: 2.988-A 4.6623 eV 265.93 nm f=0.0093 <S\*\*2>=1.982

|             |         |
|-------------|---------|
| 117A ->126A | 0.12713 |
| 119A ->125A | 0.17806 |

|             |          |
|-------------|----------|
| 119A ->126A | -0.11610 |
| 123A ->126A | -0.18061 |
| 108B ->124B | -0.12867 |
| 112B ->124B | -0.15866 |
| 116B ->124B | 0.10152  |
| 117B ->126B | 0.10690  |
| 118B ->125B | -0.15927 |
| 118B ->126B | 0.11223  |
| 123B ->127B | 0.27795  |
| 123B ->128B | 0.77410  |

Excited State 30: 2.629-A 4.6680 eV 265.60 nm f=0.0070 <S\*\*2>=1.477

|             |          |
|-------------|----------|
| 117A ->126A | -0.10970 |
| 119A ->125A | -0.15499 |
| 123A ->126A | -0.12257 |
| 124A ->127A | 0.22518  |
| 124A ->128A | 0.69662  |
| 117B ->126B | -0.10586 |
| 118B ->125B | 0.15439  |
| 118B ->126B | -0.10441 |
| 122B ->126B | 0.29191  |
| 123B ->128B | 0.34414  |

- Phenolate form, equatorial positioning of the phenolate, exogeneous ligand = water.

Excited State 1: 2.005-A 1.0839 eV 1143.89 nm f=0.0021 <S\*\*2>=0.755

|             |         |
|-------------|---------|
| 107B ->124B | 0.21778 |
| 108B ->124B | 0.15635 |
| 117B ->124B | 0.14772 |
| 120B ->124B | 0.30618 |
| 121B ->124B | 0.61461 |
| 123B ->124B | 0.60480 |

This state for optimization and/or second-order correction.

Total Energy, E(TD-HF/TD-KS) = -2926.85255517

Copying the excited state density for this state as the 1-particle RhoCI density.

Excited State 2: 2.004-A 1.6239 eV 763.47 nm f=0.0008 <S\*\*2>=0.754

|             |          |
|-------------|----------|
| 106B ->124B | 0.16105  |
| 108B ->124B | 0.35679  |
| 113B ->124B | -0.16601 |
| 115B ->124B | -0.13302 |
| 117B ->124B | -0.40821 |
| 120B ->124B | 0.68714  |
| 123B ->124B | -0.29419 |

Excited State 3: 2.002-A 1.9318 eV 641.82 nm f=0.0007 <S\*\*2>=0.752

|             |          |
|-------------|----------|
| 111B ->124B | 0.10187  |
| 112B ->124B | 0.34750  |
| 113B ->124B | -0.13216 |
| 115B ->124B | 0.66445  |
| 116B ->124B | 0.51898  |
| 117B ->124B | -0.17719 |
| 118B ->124B | -0.17935 |

Excited State 4: 2.012-A 2.0484 eV 605.28 nm f=0.0128 <S\*\*2>=0.762

|             |          |
|-------------|----------|
| 103B ->124B | -0.12077 |
| 104B ->124B | -0.10214 |
| 106B ->124B | -0.41492 |
| 107B ->124B | -0.18934 |
| 109B ->124B | -0.31338 |
| 111B ->124B | -0.33088 |
| 113B ->124B | -0.16207 |
| 115B ->124B | -0.15815 |
| 117B ->124B | -0.43883 |
| 121B ->124B | -0.19752 |
| 123B ->124B | 0.43965  |

Excited State 5: 2.022-A 2.1533 eV 575.78 nm f=0.0454 <S\*\*2>=0.772

|             |          |
|-------------|----------|
| 106B ->124B | 0.50898  |
| 107B ->124B | -0.11486 |
| 109B ->124B | 0.19493  |
| 111B ->124B | 0.27485  |
| 113B ->124B | -0.10147 |
| 121B ->124B | -0.46216 |
| 123B ->124B | 0.57750  |

Excited State 6: 3.141-A 2.9521 eV 419.98 nm f=0.0006 <S\*\*2>=2.217

|             |          |
|-------------|----------|
| 124A ->125A | 0.92922  |
| 123B ->125B | -0.32678 |

Excited State 7: 2.373-A 2.9836 eV 415.55 nm f=0.0046 <S\*\*2>=1.158

|             |         |
|-------------|---------|
| 124A ->125A | 0.33793 |
| 123B ->125B | 0.92957 |

Excited State 8: 2.046-A 3.0873 eV 401.60 nm f=0.0021 <S\*\*2>=0.797

122B ->124B 0.99133

Excited State 9: 3.382-A 3.4026 eV 364.38 nm f=0.0001 <S\*\*2>=2.609

124A ->126A 0.70060  
124A ->129A -0.14190  
124A ->131A 0.13144  
123B ->125B 0.10154  
123B ->126B -0.61668  
123B ->129B 0.13721  
123B ->131B -0.12944

Excited State 10: 2.030-A 3.4431 eV 360.10 nm f=0.0053 <S\*\*2>=0.780

124A ->126A 0.64519  
123B ->126B 0.74101  
123B ->127B 0.12245

Excited State 11: 3.390-A 3.5384 eV 350.39 nm f=0.0000 <S\*\*2>=2.623

123A ->129A -0.24634  
124A ->126A -0.19478  
124A ->127A -0.34623  
124A ->128A 0.12704  
124A ->129A -0.22586  
124A ->131A 0.42679  
122B ->129B 0.24462  
123B ->126B 0.12242  
123B ->127B 0.36698  
123B ->128B -0.12362  
123B ->129B 0.22489  
123B ->131B -0.41255

Excited State 12: 2.079-A 3.6262 eV 341.92 nm f=0.0519 <S\*\*2>=0.831

124A ->127A 0.38810  
106B ->124B -0.34216  
107B ->124B 0.15909  
108B ->124B -0.16461  
113B ->124B 0.12916  
115B ->124B 0.13084  
117B ->124B 0.32593  
119B ->124B -0.11923  
120B ->124B 0.47845  
121B ->124B -0.46215  
123B ->127B 0.14355

Excited State 13: 3.260-A 3.6616 eV 338.61 nm f=0.0003 <S\*\*2>=2.407

123A ->129A 0.18317  
124A ->127A -0.23747  
124A ->129A -0.10838  
124A ->131A -0.31340  
122B ->129B -0.18476  
123B ->126B -0.13023  
123B ->127B 0.76942  
123B ->129B 0.11348  
123B ->131B 0.29749

Excited State 14: 2.215-A 3.6799 eV 336.92 nm f=0.0258 <S\*\*2>=0.977

124A ->126A -0.12514  
124A ->127A 0.76145  
124A ->131A 0.15370  
106B ->124B 0.14977  
117B ->124B -0.14598  
120B ->124B -0.21380  
121B ->124B 0.21710  
123B ->127B 0.41018  
123B ->131B -0.11572

Excited State 15: 3.357-A 3.8184 eV 324.70 nm f=0.0002 <S\*\*2>=2.568

118A ->127A -0.13626  
122A ->125A 0.19300  
124A ->126A 0.11468  
124A ->127A -0.21288  
124A ->129A 0.55641  
124A ->130A -0.11550  
124A ->131A 0.13090  
118B ->127B 0.13661  
119B ->124B -0.11890  
123B ->126B -0.10094  
123B ->127B 0.21216  
123B ->129B -0.54098  
123B ->130B 0.12220  
123B ->131B -0.11093

Excited State 16: 3.386-A 3.8286 eV 323.84 nm f=0.0001 <S\*\*2>=2.617

114A ->125A 0.14298  
117A ->125A 0.13181  
117A ->126A 0.21019  
117A ->127A 0.14954  
118A ->126A -0.13114



|             |          |
|-------------|----------|
| 118A ->127A | 0.17654  |
| 118A ->128A | 0.13294  |
| 120A ->125A | -0.10291 |
| 121A ->125A | -0.11750 |
| 121A ->126A | -0.15646 |
| 121A ->127A | 0.17563  |
| 121A ->128A | -0.35535 |
| 122A ->125A | -0.19598 |
| 124A ->129A | 0.13005  |
| 113B ->125B | -0.10842 |
| 115B ->125B | -0.14112 |
| 116B ->126B | 0.14580  |
| 117B ->126B | 0.13858  |
| 117B ->127B | 0.10564  |
| 118B ->126B | 0.13625  |
| 118B ->127B | -0.17176 |
| 118B ->128B | -0.12952 |
| 119B ->124B | -0.11995 |
| 119B ->125B | 0.10289  |
| 119B ->126B | 0.15526  |
| 119B ->127B | -0.17616 |
| 119B ->128B | 0.35591  |
| 120B ->125B | 0.11338  |
| 121B ->125B | 0.11809  |
| 123B ->129B | -0.12436 |

Excited State 17: 3.199-A 3.8573 eV 321.43 nm f=0.0013 <S\*\*2>=2.308

|             |          |
|-------------|----------|
| 114A ->125A | -0.12419 |
| 115A ->125A | -0.10327 |
| 117A ->126A | 0.18231  |
| 118A ->126A | 0.11110  |
| 118A ->127A | -0.24163 |
| 121A ->128A | -0.28523 |
| 122A ->125A | 0.41644  |
| 124A ->127A | 0.16860  |
| 124A ->129A | -0.19970 |
| 112B ->125B | -0.10827 |
| 115B ->126B | -0.11211 |
| 116B ->126B | 0.10067  |
| 117B ->125B | 0.12731  |
| 118B ->126B | -0.10769 |
| 118B ->127B | 0.23945  |
| 119B ->124B | -0.27135 |
| 119B ->128B | 0.28325  |
| 120B ->125B | -0.11944 |
| 123B ->127B | -0.12233 |
| 123B ->129B | 0.19783  |

Excited State 18: 2.223-A 3.8931 eV 318.47 nm f=0.0005 <S\*\*2>=0.986

|             |          |
|-------------|----------|
| 121A ->128A | -0.12202 |
| 122A ->125A | 0.18405  |
| 119B ->124B | 0.92026  |
| 119B ->128B | 0.12586  |
| 120B ->124B | 0.11619  |

Excited State 19: 2.748-A 3.9671 eV 312.53 nm f=0.0057 <S\*\*2>=1.638

|             |          |
|-------------|----------|
| 114A ->125A | 0.15119  |
| 118A ->126A | -0.13570 |
| 118A ->127A | 0.22836  |
| 119A ->125A | -0.20026 |
| 122A ->125A | 0.76694  |
| 123A ->125A | -0.22468 |
| 118B ->126B | 0.14311  |
| 118B ->127B | -0.22702 |
| 120B ->125B | 0.12117  |

Excited State 20: 3.444-A 4.0644 eV 305.05 nm f=0.0000 <S\*\*2>=2.715

|             |          |
|-------------|----------|
| 121A ->125A | 0.28445  |
| 121A ->126A | 0.35227  |
| 121A ->127A | 0.23769  |
| 123A ->125A | -0.33199 |
| 123A ->126A | -0.14858 |
| 124A ->128A | 0.23940  |
| 119B ->125B | -0.28205 |
| 119B ->126B | -0.33319 |
| 119B ->127B | -0.23993 |
| 122B ->125B | 0.29941  |
| 122B ->126B | 0.14460  |
| 123B ->128B | -0.29182 |

Excited State 21: 2.062-A 4.1054 eV 302.00 nm f=0.0029 <S\*\*2>=0.813

|             |         |
|-------------|---------|
| 124A ->128A | 0.62815 |
| 123B ->128B | 0.76253 |

Excited State 22: 3.374-A 4.1240 eV 300.64 nm f=0.0000 <S\*\*2>=2.596

|             |          |
|-------------|----------|
| 118A ->125A | -0.16829 |
| 121A ->125A | -0.18379 |

|             |          |
|-------------|----------|
| 121A ->126A | -0.13869 |
| 121A ->127A | -0.13051 |
| 124A ->128A | 0.62239  |
| 124A ->129A | 0.11324  |
| 118B ->124B | 0.15654  |
| 118B ->125B | 0.14962  |
| 119B ->125B | 0.18945  |
| 119B ->126B | 0.13430  |
| 119B ->127B | 0.13348  |
| 121B ->125B | -0.10401 |
| 123B ->128B | -0.50584 |
| 123B ->129B | -0.11410 |

Excited State 23: 3.265-A 4.1417 eV 299.35 nm f=0.0009 <S\*\*2>=2.416

|             |          |
|-------------|----------|
| 118A ->125A | 0.47887  |
| 118A ->126A | -0.12763 |
| 121A ->125A | 0.13728  |
| 123A ->125A | 0.30158  |
| 124A ->128A | 0.29944  |
| 118B ->124B | -0.40681 |
| 118B ->125B | -0.42955 |
| 118B ->126B | 0.12997  |
| 119B ->124B | 0.10464  |
| 119B ->125B | -0.13936 |
| 121B ->125B | 0.13775  |
| 122B ->125B | -0.19004 |
| 123B ->128B | -0.13583 |

Excited State 24: 3.210-A 4.1897 eV 295.93 nm f=0.0031 <S\*\*2>=2.326

|             |          |
|-------------|----------|
| 120A ->125A | -0.13668 |
| 121A ->126A | -0.12296 |
| 121A ->127A | -0.11892 |
| 123A ->125A | -0.41387 |
| 119B ->127B | 0.10379  |
| 120B ->125B | 0.25654  |
| 120B ->126B | 0.14036  |
| 121B ->125B | 0.67213  |
| 121B ->126B | 0.15352  |
| 122B ->125B | 0.22639  |

Excited State 25: 2.120-A 4.2013 eV 295.11 nm f=0.0115 <S\*\*2>=0.873

|             |         |
|-------------|---------|
| 122A ->125A | 0.19261 |
| 123A ->125A | 0.67046 |
| 121B ->125B | 0.16232 |
| 122B ->125B | 0.66101 |

Excited State 26: 3.283-A 4.2353 eV 292.74 nm f=0.0017 <S\*\*2>=2.444

|             |          |
|-------------|----------|
| 118A ->125A | 0.20564  |
| 121A ->126A | -0.26218 |
| 122A ->125A | -0.12651 |
| 123A ->125A | -0.23155 |
| 123A ->129A | 0.11234  |
| 124A ->131A | 0.14059  |
| 118B ->124B | -0.21090 |
| 118B ->125B | -0.18571 |
| 119B ->125B | 0.11017  |
| 119B ->126B | 0.26572  |
| 119B ->127B | 0.10720  |
| 120B ->125B | -0.14142 |
| 121B ->125B | -0.41906 |
| 122B ->125B | 0.53709  |
| 122B ->129B | -0.11311 |
| 123B ->131B | -0.11917 |

Excited State 27: 3.398-A 4.4302 eV 279.86 nm f=0.0015 <S\*\*2>=2.637

|             |          |
|-------------|----------|
| 123A ->125A | -0.20636 |
| 123A ->126A | 0.23088  |
| 123A ->129A | -0.48028 |
| 123A ->130A | 0.10255  |
| 124A ->131A | -0.30956 |
| 116B ->124B | -0.11259 |
| 122B ->125B | 0.27124  |
| 122B ->126B | -0.20966 |
| 122B ->129B | 0.48194  |
| 122B ->130B | -0.11006 |
| 123B ->131B | 0.27745  |

Excited State 28: 2.779-A 4.4679 eV 277.50 nm f=0.0023 <S\*\*2>=1.681

|             |          |
|-------------|----------|
| 118A ->125A | 0.20011  |
| 120A ->125A | -0.34525 |
| 120A ->126A | -0.23779 |
| 120A ->127A | -0.11769 |
| 122A ->126A | 0.14571  |
| 118B ->124B | 0.53012  |
| 118B ->125B | -0.22484 |
| 119B ->125B | -0.10093 |
| 120B ->125B | 0.13127  |

|             |          |
|-------------|----------|
| 120B ->126B | 0.20788  |
| 120B ->127B | 0.11948  |
| 121B ->125B | -0.30840 |
| 121B ->126B | 0.31544  |
| 121B ->127B | 0.14154  |

Excited State 29: 2.634-A 4.4734 eV 277.16 nm f=0.0021 <S\*\*2>=1.484

|             |          |
|-------------|----------|
| 118A ->125A | 0.21700  |
| 120A ->125A | 0.26317  |
| 120A ->126A | 0.20305  |
| 121A ->125A | 0.11598  |
| 122A ->126A | -0.21423 |
| 116B ->124B | 0.11191  |
| 118B ->124B | 0.63210  |
| 118B ->125B | -0.22365 |
| 119B ->126B | 0.11054  |
| 120B ->125B | -0.18908 |
| 120B ->126B | -0.16948 |
| 121B ->125B | 0.29865  |
| 121B ->126B | -0.24055 |

Excited State 30: 2.534-A 4.5072 eV 275.08 nm f=0.0032 <S\*\*2>=1.356

|             |          |
|-------------|----------|
| 119A ->125A | 0.12050  |
| 120A ->125A | -0.17658 |
| 122A ->126A | 0.82078  |
| 123A ->126A | -0.22778 |
| 120B ->125B | -0.28608 |
| 120B ->126B | -0.13967 |
| 121B ->126B | -0.21195 |
